# Supplementary material for: Long-term mortality after community-acquired pneumonia—impacts of diabetes and newly discovered hyperglycaemia: a prospective, observational cohort study
Source: PubMed Central journal article supplement — BMJ Open. 2014 Aug 21;4(8):e005715. doi: 10.1136/bmjopen-2014-005715 (PMC4156798; doi:10.1136/bmjopen-2014-005715), 2014-08-21
Supplement: bmjopen-2014-005715.draft_revisions.pdf [file bmjopen-2014-005715.draft_revisions.pdf]

# BMJ Open

## The long-term mortality after community-acquired pneumonia: Impacts of diabetes and newly discovered hyperglycaemia. A prospective, observational cohort study.

|                                 |                                                                                                                                                                                                                                                                                                                                                                                                                                                                                                                                              |
|---------------------------------|----------------------------------------------------------------------------------------------------------------------------------------------------------------------------------------------------------------------------------------------------------------------------------------------------------------------------------------------------------------------------------------------------------------------------------------------------------------------------------------------------------------------------------------------|
| Journal:                        | <i>BMJ Open</i>                                                                                                                                                                                                                                                                                                                                                                                                                                                                                                                              |
| Manuscript ID:                  | bmjopen-2014-005715                                                                                                                                                                                                                                                                                                                                                                                                                                                                                                                          |
| Article Type:                   | Research                                                                                                                                                                                                                                                                                                                                                                                                                                                                                                                                     |
| Date Submitted by the Author:   | 16-May-2014                                                                                                                                                                                                                                                                                                                                                                                                                                                                                                                                  |
| Complete List of Authors:       | Koskela, Heikki; Kuopio University Hospital, Unit for Medicine and Clinical Research, department of respiratory medicine; University of Eastern Finland, School of Medicine, Institute of Clinical Sciences, Faculty of Health Sciences<br>Salonen, Pivi; Kuopio University Hospital, Unit for Medicine and Clinical Research, Respiratory Medicine<br>Romppanen, Jarkko; Eastern Finland Laboratory Centre,<br>Niskanen, Leo; University of Eastern Finland, School of Medicine, Institute of Clinical Sciences, Faculty of Health Sciences |
| <b>Primary Subject Heading</b>: | Respiratory medicine                                                                                                                                                                                                                                                                                                                                                                                                                                                                                                                         |
| Secondary Subject Heading:      | Diabetes and endocrinology, Infectious diseases                                                                                                                                                                                                                                                                                                                                                                                                                                                                                              |
| Keywords:                       | Diabetes & endocrinology < INTERNAL MEDICINE, Thoracic medicine < INTERNAL MEDICINE, Adult thoracic medicine < THORACIC MEDICINE, Respiratory infections < THORACIC MEDICINE                                                                                                                                                                                                                                                                                                                                                                 |
|                                 |                                                                                                                                                                                                                                                                                                                                                                                                                                                                                                                                              |

SCHOLARONE™  
Manuscripts

1  
2  
3 **The long-term mortality after community-acquired pneumonia: Impacts of diabetes and newly**  
4 **discovered hyperglycaemia. A prospective, observational cohort study.**  
5

6 Running title: Pneumonia and hyperglycaemia  
7

8 Heikki O Koskela, MD <sup>1</sup>, Päivi H Salonen, MD <sup>2</sup>, Jarkko Romppanen, MD <sup>3</sup>, Leo Niskanen, MD <sup>4</sup>  
9

10  
11  
12 <sup>1</sup> Unit for Medicine and Clinical Research, Pulmonary Division, Kuopio University Hospital, PB 1777, 70211  
13 Kuopio, Finland and School of Medicine, Institute of Clinical Sciences, Faculty of Health Sciences, University  
14 of Eastern Finland, PB 1627, 70211 Kuopio, Finland  
15

16 <sup>2</sup> Unit for Medicine and Clinical Research, Pulmonary Division, Kuopio University Hospital, PB 1777, 70211  
17 Kuopio, Finland  
18

19 <sup>3</sup> Eastern Finland Laboratory Centre, PB 1700, 70211 Kuopio, Finland  
20

21 <sup>4</sup> School of Medicine, Institute of Clinical Sciences, Faculty of Health Sciences, University of Eastern Finland,  
22 PB 1627, 70211 Kuopio, Finland and Finnish Medicines Agency Fimea, PB 55, 00034 FIMEA, Helsinki, Finland  
23  
24

25  
26 Corresponding author: Heikki O Koskela  
27

28 Unit for Medicine and Clinical Research, Pulmonary Division, Kuopio University Hospital, Kuopio, Finland  
29

30 Postal address: PL 1777, 70211 Kuopio, FINLAND  
31

32 e-mail: heikki.koskela@kuh.fi  
33  
34

35 Key words: Pneumonia, pneumonia mortality, diabetes, hyperglycaemia  
36  
37  
38

39 Word count: 2589  
40  
41  
42  
43  
44  
45  
46  
47  
48  
49  
50  
51  
52  
53  
54  
55  
56  
57  
58  
59  
60

**ABSTRACT**

**Objectives** Community-acquired pneumonia is associated with a significant long-term mortality after initial recovery. It has been acknowledged that additional research is urgently needed to examine the contributors to this long-term mortality. The objective of the present study was to assess whether diabetes or newly discovered hyperglycaemia during pneumonia affects the long-term mortality.

**Design:** A prospective, observational cohort study

**Setting:** A single secondary centre in eastern Finland

**Participants:** 153 consecutive hospitalised patients who survived at least 30 days after mild to moderate community-acquired pneumonia.

**Interventions:** Plasma glucose levels were recorded seven times during the first day on the ward. Several possible confounders were also recorded. The surveillance status and causes of death were recorded after median of five years and eleven months.

**Results** In multivariate Cox regression analysis, a previous diagnosis of diabetes among the whole population (adjusted hazard ratio 2.84 (1.35 – 5.99)) and new postprandial hyperglycaemia among the non-diabetic population (adjusted hazard ratio 2.56 (1.04 – 6.32)) showed independent associations with late mortality. New fasting hyperglycaemia was not an independent predictor. The mortality rates at the end of follow-up were 54 %, 37 %, and 10 % among patients with diabetes, non-diabetic patients with new postprandial hyperglycaemia, and non-diabetic patients without postprandial hyperglycaemia, respectively ( $p < 0.001$ ). The underlying causes of death roughly mirrored those in Finnish general population with a slight excess in mortality due to chronic respiratory diseases. Pneumonia was the immediate cause of death in just 8 % of all late deaths.

**Conclusions** A previous diagnosis of diabetes and newly discovered postprandial hyperglycaemia increase the risk of death for several years after community-acquired pneumonia. As the knowledge about patient subgroups with an increased late mortality risk is gradually gathering, more studies are needed to evaluate the possible post-pneumonia interventions to reduce the late mortality.

**Strengths and limitations of the study**

- The plasma glucose levels were carefully measured during pneumonia with seven plasma glucose measurements during the first day on ward
- The prospective nature of the study provided comprehensive collection of information about possible confounders
- The main limitation is the lack of validated pneumonia severity scoring although several pneumonia severity-related variables were collected
- The present population consists of patients with mild to moderate CAP. Therefore, the results cannot be generalised to all hospitalised pneumonia patients.

For peer review only

## INTRODUCTION

Pneumonia is the leading cause of infectious death worldwide with 3.2 million annual victims.[1] This figure, which is impressive enough *per se*, only contains the acute mortality. Pneumonia is also associated with significant late mortality up to several years afterwards among patients who survive the initial episode. In a large population-based cohort study, the mortality rate was 53 % at five years after an episode of community-acquired pneumonia (CAP).[2] Importantly, the long-term mortality is substantially higher than that of either the general population or a control population hospitalised for reasons other than CAP.[3-5] Given the high and rising incidence of CAP, its long-acting effect on mortality should be regarded as major public health threat.[6 7] It has been acknowledged that additional research is urgently needed to examine the contributors to this long-term mortality.[8]

Probably the most consistently identified contributor to late mortality after CAP is the presence of comorbid conditions, especially neurodegenerative disorders, cardiovascular conditions, malignancy, and chronic obstructive lung disease.[7] To the best of our knowledge, diabetes has not been investigated in this respect. Yende *et al.* analysed two large CAP cohorts and found out that diabetes increased the mortality rate within the first year after CAP with unadjusted hazard ratios (HR) of 1.4 - 1.9.[9] They suggested that the higher mortality may be due to worsening of pre-existing cardiovascular disease or higher risk of acute kidney injury. However, the early and late deaths were not analysed separately and the follow-up time was relatively short.

Hyperglycaemia is associated with short-term mortality in several acute disorders including CAP.[10-14] In pneumonia, a newly detected hyperglycaemia among non-diabetic patients seems to increase the short-term mortality rate more than hyperglycaemia among diabetic patients.[13] The impact of new, pneumonia-associated hyperglycaemia on the long-term mortality has not been investigated. The objective of the present study was to assess whether diabetes or newly discovered hyperglycaemia among non-diabetics affects the late mortality after CAP.

## METHODS

### Study design and the population

1  
2  
3 This prospective, observational cohort study was carried out at Kuopio University Hospital in Finland. From  
4 November 2006 to May 2008 all adult patients admitted to the pulmonology ward due to CAP were  
5 recruited. The patients were considered to have pneumonia if they had an acute febrile illness with a new  
6 radiographic shadowing. During that time 245 patients were hospitalised because of pneumonia (figure 1).  
7 Patients were excluded from this study if they had severe pneumonia requiring treatment in the intensive  
8 care unit, if they could not give informed consent due to confusion, or if their antibiotic treatment had  
9 already been started on another institution. Altogether 92 patients were excluded and 153 patients  
10 included. All the 153 patients survived at least 30 days after admission. Among them, 22 had a previous  
11 diagnosis of diabetes (table 1).  
12  
13  
14  
15  
16  
17  
18  
19  
20

### 21 **Measurements during pneumonia**

22  
23  
24

25 During the first 24 hours on the ward the plasma glucose was determined seven times, at three o'clock at  
26 night, before breakfast, before lunch, after lunch, before dinner, after dinner, and at bedtime. In addition,  
27 the family history for diabetes and the pre-pneumonia Karnofsky performance score were assessed. Height,  
28 weight, waist circumference, oxygen saturation, blood pressure, temperature, and heart rate were  
29 measured. Blood tests included glycosylated haemoglobin A1c (HbA1c), N-terminal pro B-type natriuretic  
30 peptide (NT-proBNP), C-reactive protein, leukocytes, urea, and arterial blood gas analysis.  
31  
32  
33  
34  
35  
36  
37  
38

39 The detailed description of the methods and the baseline results have been published.[15] However, the  
40 NT-proBNP analysis will be described here for the first time. It was added to the present study since it has  
41 been shown to associate with pneumonia prognosis.[16] It was measured from the blood sample collected  
42 at admission utilising a commercially available electrochemiluminescence immunoassay (Roche Diagnostics  
43 GmbH, Mannheim, Germany). Elevated NT-proBNP was defined as plasma concentration above 450 ng/l  
44 for patients younger than 50 years, above 900 ng/l for patients aged 50 – 75 years and above 1800 ng/ml  
45 for patients older than 75 years.[17]  
46  
47  
48  
49  
50  
51  
52  
53  
54  
55  
56  
57  
58  
59  
60

Table 1. Patient characteristics

|                                | Diabetic patients (N = 22) | p <sup>a</sup> | Patients without diabetes (N = 131)  |                                         | p <sup>b</sup> | Patients with missing data |
|--------------------------------|----------------------------|----------------|--------------------------------------|-----------------------------------------|----------------|----------------------------|
|                                |                            |                | Postprandial hyperglycaemia (n = 43) | No postprandial hyperglycaemia (n = 88) |                |                            |
| Age, yrs                       | 66 (59 - 73)               | 0.04           | 66 (60 - 71)                         | 53 (49 - 58)                            | 0.001          | 0                          |
| Male gender                    | 68 %                       | 0.40           | 67 %                                 | 54 %                                    | 0.16           | 0                          |
| Family history of diabetes     | 68 %                       | 0.004          | 47 %                                 | 30 %                                    | 0.07           | 14                         |
| BMI, kg/m <sup>2</sup>         | 33 (28 - 37)               | 0.001          | 27 (25 - 29)                         | 27 (26 - 29)                            | 0.56           | 0                          |
| Waist circumference, cm        | 110 (102 - 118)            | <0.001         | 100 (95 - 104)                       | 97 (94 - 100)                           | 0.27           | 18                         |
| gHbA1c, %                      | 7.83 (6.97 - 8.69)         | <0.001         | 6.12 (5.79 - 6.44)                   | 5.64 (5.53 - 5.76)                      | <0.001         | 7                          |
| Karnofsky 80% or less          | 50 %                       | 0.02           | 44 %                                 | 16 %                                    | <0.001         | 0                          |
| Three or more comorbidities    | 54 %                       | <0.001         | 23 %                                 | 14 %                                    | 0.17           | 0                          |
| Diastolic blood pressure, mmHg | 75 (69 - 81)               | 0.12           | 81 (75 - 86)                         | 80 (77 - 84)                            | 0.99           | 1                          |
| Heart rate, 1/min              | 99 (90 - 109)              | 0.22           | 100 (92 - 107)                       | 91 (86 - 95)                            | 0.005          | 1                          |
| Oxygen saturation (%)          | 92 (89 - 94)               | 0.35           | 91 (89 - 93)                         | 94 (93 - 95)                            | 0.004          | 13                         |
| Leukocytes, 10 <sup>9</sup> /l | 11.8 (9.6 - 13.9)          | 0.46           | 12.4 (10.6 - 14.3)                   | 11.7 (10.1 - 13.3)                      | 0.10           | 0                          |
| Urea, mmol/l                   | 6.88 (4.96 - 8.79)         | 0.28           | 8.61 (6.41 - 10.8)                   | 4.72 (4.00 - 5.44)                      | <0.001         | 11                         |
| CRP, mg/l                      | 164 (119 - 209)            | 0.97           | 228 (166 - 289)                      | 146 (127 - 165)                         | <0.001         | 1                          |
| Elevated NT-proBNP             | 32 %                       | 0.51           | 29 %                                 | 23 %                                    | 0.47           | 4                          |
| Length of hospital stay, days  | 5.8 (4.6 - 7.1)            | 0.53           | 6.6 (5.7 - 7.5)                      | 5.9 (5.2 - 6.6)                         | 0.03           | 1                          |

BMI, body mass index; gHbA1c, glycosylated haemoglobin A1c expressed as percentage of total haemoglobin; CRP, C-reactive protein; NT-proBNP, plasma N-terminal pro B-type natriuretic peptide. The data is presented either as percentage of patients showing the feature or means (95 % confidence intervals)

<sup>a</sup> p value indicates the differences between diabetic and non-diabetic patients

<sup>b</sup> p value indicates the differences between the patients with and without postprandial hyperglycaemia within the non-diabetic patients.

## Definitions

Diabetes was defined as doctor's diagnosis of diabetes which had been set before the current pneumonia episode, and verified from the patient files. New hyperglycaemia was defined as hyperglycaemia during the first 24 hours of pneumonia hospitalisation in a patient without a doctor's diagnosis of diabetes. Fasting hyperglycaemia was defined as hyperglycaemia detected at three o'clock at night or at seven o'clock in the morning before breakfast. Postprandial hyperglycaemia was defined as hyperglycaemia detected during the daytime or in the evening. The main outcome variable was mortality from 30 days after pneumonia up to the end of follow-up. The predictor variables were diabetes, new fasting hyperglycaemia, and new postprandial hyperglycaemia. A confounder was a variable which showed an association with both the plasma glucose levels during pneumonia and the late mortality. However, a potential confounder with a causal relationship to the outcome variable was not included. Furthermore, if two potential confounders were closely interrelated, the one with a closer association with the plasma glucose levels was included.

## Follow-up after pneumonia

In September 2013 the survival status was obtained in all patients from the National Statistical Service of Finland. The immediate and underlying causes of death, according to the International Classification of Diseases version 10, were obtained from death certificates. The median follow-up was five years and eleven months.

## Ethics

The study was reviewed by the Research Ethic Committee, Hospital District of Northern Savo (75//2006 ) and it was performed in accordance with the ethical standards laid down on the 2000 Declaration of Helsinki. All patients gave their written informed consent.



## Statistical analysis

Comparative survival curves were constructed using Kaplan-Meier methodology. The unadjusted HRs were assessed utilising univariate Cox regression analysis. Continuous data was divided to quartiles. The assumption of proportional hazard was checked by graphically comparing the hazard curves. To determinate the adjusted HRs for diabetes, new fasting hyperglycaemia and new postprandial hyperglycaemia, Cox multivariate regression analysis with backwards directed stepwise procedure was utilised. In this analysis patients with missing data were excluded.

The analysis about the effect of new hyperglycaemia was restricted to the 131 non-diabetic pneumonia patients. Among them, receiver operator curves (ROC) were produced for both fasting and postprandial plasma glucose values to define the best cut-off values to predict death during the follow-up.

Frequency comparison was performed by Chi-squared test. Student's T-test and Pearson correlation coefficient were utilised when appropriate. Categorical data is expressed as percentages and continuous data as means and 95 % confidence intervals (CI). Statistical significance was defined as a p-value of < 0.05. Analyses were performed using SPSS V.19.0 for the personal computer (SPSS, Inc. Chicago, Illinois, USA).

## RESULTS

### Univariate analysis and the ROC analysis

Table 1 shows the numbers of patients in each subgroup and their characteristics. The following features showed a statistically significant association with the late mortality within the whole population: Presence of diabetes (HR 3.5 (1.7 - 6.9), figure 2), advanced age, Karnofsky score equal or less than 80 %, presence of three or more co-morbidities, low diastolic blood pressure, low arterial blood oxygen saturation, high urea, NT-proBNP above predicted value[17], high gHbA1c, and long hospital stay (data not shown). The proportional hazards remained constant over time.

1  
2  
3 Among the non-diabetic patients, the ROC analysis of the fasting plasma glucose measurements revealed  
4 that the level of 7.05 mmol/l was the best cut-off value to predict late mortality (results not shown). A  
5 glucose level exceeding it showed an unadjusted HR of 2.7 (1.1 – 6.4) ( $p = 0.027$ ). 52 % of the non-diabetic  
6 patients showed a fasting glucose level exceeding 7.05 mmol/l. In one patient, no fasting glucose values  
7 were obtained. The ROC analysis of the postprandial glucose measurements revealed that the level of  
8 10.75 mmol/l was the best cut-off value (results not shown). The corresponding unadjusted HR was 4.2 (1.9  
9 – 9.6) ( $p = 0.001$ , figure 2). 33 % of the non-diabetic patients showed a postprandial glucose level exceeding  
10 10.75 mmol/l. Utilising these plasma glucose cut-off values among the 22 diabetic patients it could be  
11 shown that 19 of them (86 %) showed fasting hyperglycaemia and 18 (82 %) showed postprandial  
12 hyperglycaemia.  
13  
14  
15  
16  
17  
18  
19  
20  
21

### 22 **Multivariate analysis**

23  
24  
25  
26  
27 The following confounders were included: Age, Karnofsky score equal or less than 80%, elevated plasma  
28 NT-proBNP, and plasma urea concentration. The results of the multivariate Cox regression analysis are  
29 shown in tables 2 and 3. It can be seen that a diagnosis of diabetes among the whole population (table 2)  
30 and new postprandial hyperglycaemia among the non-diabetic population (table 3) showed independent  
31 associations with late mortality after pneumonia. New fasting hyperglycaemia was not a predictor of  
32 mortality when the confounders were taken into account ( $p = 0.74$ ).  
33  
34  
35  
36  
37  
38  
39

### 40 **The mortality rates and the causes of death**

41  
42  
43  
44  
45 The mortality rates at the end of follow-up were 54 %, 37 %, and 10 % among patients with diabetes, non-  
46 diabetic patients with new postprandial hyperglycaemia, and non-diabetic patients without postprandial  
47 hyperglycaemia, respectively ( $p < 0.001$ ). The underlying causes of death are shown in table 4. The  
48 immediate causes of death mirrored the underlying causes. Pneumonia was the immediate cause of death  
49 in just three cases (8 % of all deaths).  
50  
51  
52  
53  
54  
55  
56  
57  
58  
59  
60

Table 2. Cox multivariate regression analysis with backward directed stepwise procedure about the effect of diabetes on the risk of late death after pneumonia. The included confounders were age, Karnofsky score equal or less than 80%, elevated plasma NT-proBNP, and plasma urea concentration. Only factors with at least suggestive independent association ( $p < 0.10$ ) with the risk of late death are presented. N = 153

|                                  | <b>Adjusted hazard ratio</b> | <b>95 % CI</b> | <b>P value</b> |
|----------------------------------|------------------------------|----------------|----------------|
| Diabetes                         | 2.84                         | 1.35 – 5.99    | 0.006          |
| Karnofsky equal or less than 80% | 4.19                         | 1.86 – 9.46    | 0.001          |
| Age, years                       | 1.53*                        | 1.00 – 2.34    | 0.048          |
| Urea, mmol/L                     | 1.78*                        | 1.20 - 2.64    | 0.004          |

\*Hazard ratio is expressed per quartile

Table 3. Cox multivariate regression analysis with backward directed stepwise procedure about the effect of new postprandial hyperglycaemia on the risk of late death after pneumonia. The included confounders were age, Karnofsky score equal or less than 80%, elevated plasma NT-proBNP, and plasma urea concentration. Only factors with at least suggestive independent association ( $p < 0.10$ ) with the risk of late death are presented. N = 131

|                                  | <b>Adjusted hazard ratio</b> | <b>95 % CI</b> | <b>P value</b> |
|----------------------------------|------------------------------|----------------|----------------|
| New postprandial hyperglycaemia  | 2.56                         | 1.04 – 6.32    | 0.041          |
| Karnofsky equal or less than 80% | 3.26                         | 1.12 – 9.47    | 0.030          |
| Age, years                       | 1.97*                        | 1.14 – 3.39    | 0.015          |

\*Hazard ratio is expressed per quartile

Table 4. The underlying causes of late death

| Group                                                     | Cancer   | Cardiovascular | Obstructive lung diseases | Miscellaneous |
|-----------------------------------------------------------|----------|----------------|---------------------------|---------------|
| No diabetes, no postprandial hyperglycaemia (9 deaths)    | 2 (22 %) | 4 (44 %)       | 0 (0 %)                   | 3 (33 %)      |
| No diabetes, with postprandial hyperglycaemia (16 deaths) | 1 (6 %)  | 4 (25 %)       | 7 (44 %)                  | 4 (25 %)      |
| Diabetes (11 deaths)                                      | 3 (27 %) | 6 (54 %)       | 0 (0 %)                   | 2 (18 %)      |
| All patients (36 deaths)                                  | 6 (17 %) | 14 (39 %)      | 7 (19 %)                  | 9 (25 %)      |

## DISCUSSION

The present study confirms that both the pre-pneumonia health status and the severity of pneumonia are associated with the late mortality after CAP.[7] Both of them could be taken into account in the present study. It showed that a pre-pneumonia diagnosis of diabetes is associated with a three-fold increase in the risk of death up to six years after mild to moderate CAP. The study thus corroborates and extends the findings of Yende et al, who reported of increased mortality rates in diabetic patients up to one year after pneumonia.[9] The present study also demonstrated that new postprandial hyperglycaemia among non-diabetic patients shows an independent association with late mortality after pneumonia. Such an association has not been described earlier.

1  
2  
3 In acute illnesses, complex mechanisms involving hormones and cytokines lead to hyperglycaemia which is  
4 mainly caused by excessive hepatic glucose production and manifested by high fasting glucose values.[12]  
5  
6 This probably explains our finding that fasting hyperglycaemia was more common than postprandial  
7 hyperglycaemia among the non-diabetic CAP patients. As fasting hyperglycaemia was not an independent  
8 predictor of mortality in the present study, it may be regarded as an adequate body response to infection.  
9  
10 Postprandial hyperglycaemia, in turn, is considered as the first step in the deterioration of glucose  
11 homeostasis.[18] In the present study, the survival curves of the diabetic patients and the non-diabetic  
12 patients with postprandial hyperglycaemia were almost identical up to 2.5 years. There is evidence  
13 suggesting that postprandial hyperglycaemia is an independent risk factor for cardiovascular disease,  
14 stroke, retinopathy, renal failure, and neurologic complications in both diabetic and non-diabetic  
15 individuals.[18] Excess late mortality after CAP can now be added to that list.  
16  
17  
18  
19  
20  
21  
22  
23

24 One may suspect that the hyperglycaemic patients without a previous, doctor's diagnosis of diabetes may  
25 actually have suffered from diabetes without knowing it. HbA1c reflects mean blood glucose levels during  
26 the previous 2 – 3 months and can be used to diagnose diabetes.[19] It is true that the HbA1c values were  
27 higher in the non-diabetic patients with new postprandial hyperglycaemia than in those without it.  
28  
29 However, the 95 % confidence interval of their HbA1c values was below 6.5 % which is considered  
30 diagnostic for diabetes[19] and also well below the HbA1c values of the diabetic patients. In addition, the  
31 patients with new postprandial hyperglycaemia did not differ from the euglycaemic non-diabetic patients  
32 with respect to family history of diabetes, body mass index, or waist circumference. On the contrary, the  
33 patients with a doctor's diagnosis of diabetes clearly differed from the rest of the population by showing all  
34 these typical features of type 2 diabetes.[20] Therefore, most of the CAP patients with new postprandial  
35 hyperglycaemia probably did not have an undiagnosed diabetes before pneumonia. This supports the view  
36 that stress hyperglycaemia and diabetes are two separate disorders.[12 15 21]  
37  
38  
39  
40  
41  
42  
43  
44  
45  
46

47 The commonly used plasma glucose cut-off values for transient hyperglycaemia during illness (stress  
48 hyperglycaemia) have been adopted from the diabetes diagnostics (fasting glucose > 6.9 mmol/l or random  
49 glucose > 11.1 mmol/l).[12] To our knowledge, they have not been validated in non-diabetic patients with  
50 acute illnesses. The present material allowed us to define cut-off values that showed the best predictive  
51 power for late mortality after CAP among the non-diabetic patients: 7.05 mmol/l for fasting glucose and  
52 10.75 mmol/l for postprandial glucose. Our values were surprisingly close to those adopted from diabetes  
53 diagnostics and thus support their use also among non-diabetic patients with stress hyperglycaemia.  
54  
55  
56  
57  
58  
59  
60

1  
2  
3  
4  
5 The present paper provides some new information how to identify patients at increased risk of death late  
6 after CAP. However, it is not known whether the identification of such patients can influence their long-  
7 term prognosis. Streptococcus pneumonia vaccination after CAP may be of limited value since just 8 % of all  
8 late deaths were caused by pneumonia in the present study. This is in accordance with a larger study in  
9 which just 6 % of short-term survivors from CAP finally died of pneumonia.[5] The underlying causes of  
10 death in the present population roughly mirrored those in Finnish general population [22] with one  
11 exception: In the general population, the proportion of a chronic lung disease as the underlying cause of  
12 death is 4 % but in the present population it was 19 %. The above-mentioned Dutch study reported exactly  
13 the same finding with much higher numbers of deaths.[5] This may be, at least partly, due to patients with  
14 obstructive lung diseases being prone to catch CAP and prone to be hospitalised in case of CAP.[23]  
15  
16  
17  
18  
19  
20  
21  
22  
23  
24

25 If the possibilities for secondary interventions are to be established, the focus should perhaps be in the  
26 primary prevention of pneumonia. The present study suggests that pneumococcus vaccination should be  
27 focused on diabetic patients, aged patients, and those with low performance status, among other groups  
28 previously reported to show an excessive long-term mortality after pneumonia.[7 24]  
29  
30  
31  
32  
33

34 The main strength of the present study was the careful way to detect hyperglycaemia during pneumonia  
35 with seven plasma glucose measurements during the first day on ward, also including night-time  
36 measurements. Most previous studies about the effects of hyperglycaemia on pneumonia prognosis are  
37 handicapped by the small number, usually one, of plasma glucose measurements. Plasma glucose levels  
38 vary markedly within a day during an acute illness and a single measurement can easily miss the highest  
39 values.[15 21] Frequent glucose measurements explain the higher prevalence of new hyperglycaemia in the  
40 present study compared with the previous ones.[10 11] The prospective nature and the comprehensive  
41 collection of information about possible confounders may also be considered as strengths.  
42  
43  
44  
45  
46  
47  
48  
49  
50

51 The main limitation of the present study was the lack of validated pneumonia severity scoring. However,  
52 many severity-related variables like oxygen saturation, temperature, blood pressure, heart rate, C-reactive  
53 protein, leukocytes, urea, and arterial blood gas analysis, were recorded. The population did not include  
54 patients who were confused and patients who needed treatment in intensive care unit. The present  
55  
56  
57  
58  
59  
60

1  
2  
3 population thus consists of patients with mild to moderate CAP. Therefore, the results cannot be  
4 generalised to all hospitalised pneumonia patients.  
5  
6  
7  
8

9  
10 In conclusion, a previous diagnosis of diabetes and newly discovered postprandial hyperglycaemia increase  
11 the risk of death for several years after CAP. As the knowledge about patient subgroups with an increased  
12 late mortality risk is gradually gathering, more studies are needed to evaluate the possible post-pneumonia  
13 interventions to reduce the late mortality.  
14  
15  
16  
17  
18  
19  
20  
21  
22  
23  
24  
25  
26  
27  
28  
29  
30  
31  
32  
33  
34  
35  
36  
37  
38  
39  
40  
41  
42  
43  
44  
45  
46  
47  
48  
49  
50  
51  
52  
53  
54  
55  
56  
57  
58  
59  
60

**Funding**

The study was mainly funded by the Hospital District of Northern Savo. In addition, Päivi Salonen has received funding from Finnish Anti-Tuberculosis Association Foundation and Pulmonary Foundation in Kuopio Area. The funding sources have no involvement in study design; in collection, analysis, or interpretation of data; in the writing of the report; or in the decision to submit the manuscript for publication.

**Competing interests**

The authors have no competing interests

**Ethics approval**

The study was reviewed by the Research Ethic Committee, Hospital District of Northern Savo (75//2006 ) and it was performed in accordance with the ethical standards laid down on the 2000 Declaration of Helsinki. All patients gave their written informed consent.

**Contributions**

Heikki Koskela has made substantial contributions to conception and design, acquisition of data, and analysis and interpretation of data; He has written the article and is the guarantor.

Päivi Salonen has made substantial contributions to conception and design, acquisition of data, and analysis and interpretation of data. She has revised the article critically for important intellectual content and provided final approval of the version to be published.

Jarkko Romppanen has made substantial contributions to conception and design, acquisition of data, and analysis and interpretation of data. He has revised the article critically for important intellectual content and provided final approval of the version to be published.

Leo Niskanen has made substantial contributions to conception and design, acquisition of data, and analysis and interpretation of data. He has revised the article critically for important intellectual content and provided final approval of the version to be published.

**Data sharing statement**

Extra data is available by emailing Heikki Koskela



**Acknowledgements**

We thank all the nurses on the respiratory medicine ward of Unit of Medicine and Clinical Research, Kuopio University Hospital, for measuring the plasma glucose values.

For peer review only

## REFERENCES

1. World Health Organization. The top 10 causes of death 2011. Secondary The top 10 causes of death 2011 2013. <http://who.int/mediacentre/factsheets/fs310/en/>. Access date 16.05.2014
2. Johnstone J, Eurich DT, Majumdar SR, Jin Y, Marrie TJ. Long-term morbidity and mortality after hospitalization with community-acquired pneumonia: a population-based cohort study. *Medicine (Baltimore)* 2008;87:329-34.
3. Koivula I, Sten M, Makela PH. Prognosis after community-acquired pneumonia in the elderly: a population-based 12-year follow-up study. *Arch Intern Med* 1999;159:1550-5.
4. Kaplan V, Clermont G, Griffin MF, et al. Pneumonia: still the old man's friend? *Arch Intern Med* 2003;163:317-23.
5. Bruns AH, Oosterheert JJ, Cucciolillo MC, et al. Cause-specific long-term mortality rates in patients recovered from community-acquired pneumonia as compared with the general Dutch population. *Clin Microbiol Infect* 2011;17:763-8.
6. Ewig S, Torres A. Community-acquired pneumonia as an emergency: time for an aggressive intervention to lower mortality. *Eur Respir J* 2011;38:253-60.
7. Restrepo MI, Faverio P, Anzueto A. Long-term prognosis in community-acquired pneumonia. *Curr Opin Infect Dis* 2013;26:151-8.
8. Mortensen EM. Potential causes of increased long-term mortality after pneumonia. *Eur Respir J* 2011;37:1306-7.
9. Yende S, van der Poll T, Lee M, et al. The influence of pre-existing diabetes mellitus on the host immune response and outcome of pneumonia: analysis of two multicentre cohort studies. *Thorax* 2010;65:870-7.
10. Kinzel T, Smith M. Hyperglycemia as a predictor for mortality in veterans with pneumonia. *Exp Aging Res* 1988;14:99-102.
11. McAlister FA, Majumdar SR, Blitz S, Rowe BH, Romney J, Marrie TJ. The relation between hyperglycemia and outcomes in 2,471 patients admitted to the hospital with community-acquired pneumonia. *Diabetes Care* 2005;28:810-5.
12. Dungan KM, Braithwaite SS, Preiser JC. Stress hyperglycaemia. *Lancet* 2009;373:1798-807.
13. Rueda AM, Ormond M, Gore M, Matloobi M, Giordano TP, Musher DM. Hyperglycemia in diabetics and non-diabetics: effect on the risk for and severity of pneumococcal pneumonia. *J Infect* 2010;60:99-105.
14. Lepper PM, Ott S, Nuesch E, et al. Serum glucose levels for predicting death in patients admitted to hospital for community acquired pneumonia: prospective cohort study. *BMJ* 2012;344:e3397.

- 1  
2  
3 15. Salonen PH, Koskela HO, Niskanen L. Prevalence and determinants of hyperglycaemia in pneumonia  
4 patients. *Scand J Infect Dis* 2013;45:88-94.  
5  
6 16. Kruger S, Papassotiriou J, Marre R, et al. Pro-atrial natriuretic peptide and pro-vasopressin to predict  
7 severity and prognosis in community-acquired pneumonia : Results from the German competence  
8 network CAPNETZ. *Intensive Care Med* 2007;33:2069-78.  
9  
10 17. Januzzi JL, van Kimmenade R, Lainchbury J, et al. NT-proBNP testing for diagnosis and short-term  
11 prognosis in acute destabilized heart failure: an international pooled analysis of 1256 patients: the  
12 International Collaborative of NT-proBNP Study. *Eur Heart J* 2006;27:330-7.  
13  
14 18. Gerich J. Pathogenesis and management of postprandial hyperglycemia: role of incretin-based  
15 therapies. *Int J Gen Med* 2013;6:877-95.  
16  
17 19. Standards of medical care in diabetes--2013. *Diabetes Care* 2013;36 S11-66.  
18  
19 20. Noble D, Mathur R, Dent T, Meads C, Greenhalgh T. Risk models and scores for type 2 diabetes:  
20 systematic review. *BMJ* 2011;343:d7163.  
21  
22 21. Koskela HO, Salonen PH, Niskanen L. Hyperglycaemia during exacerbations of asthma and chronic  
23 obstructive pulmonary disease. *Clin Respir J* 2013;7:382-9.  
24  
25 22. National Statistical Service of Finland. The causes of death 2012.  
26  
27 [https://tilastokeskus.fi/til/ksyyt/2012/ksyyt\\_2012\\_2013-12-30\\_tie\\_001\\_fi.html](https://tilastokeskus.fi/til/ksyyt/2012/ksyyt_2012_2013-12-30_tie_001_fi.html). Access date  
28 16.05.2014  
29  
30 23. Farr BM, Sloman AJ, Fisch MJ. Predicting death in patients hospitalized for community-acquired  
31 pneumonia. *Ann Intern Med* 1991;115:428-36.  
32  
33 24. Blasi F, Mantero M, Santus P, Tarsia P. Understanding the burden of pneumococcal disease in adults.  
34  
35 *Clin Microbiol Infect* 2012;18 7-14.  
36  
37  
38  
39  
40  
41  
42  
43  
44  
45  
46  
47  
48  
49  
50  
51  
52  
53  
54  
55  
56  
57  
58  
59  
60

**FIGURE LEGENDS**

Figure 1. Inclusion of the patients. Patients were excluded from this study if they had severe pneumonia requiring treatment in the intensive care unit, if they could not give informed consent due to confusion, or if their antibiotic treatment had already been started on another institution.

Figure 2. Kaplan-Meier plot showing long-term survival after community-acquired pneumonia among patients with diabetes (N = 22), non-diabetic patients with new postprandial hyperglycaemia (N = 43), and non-diabetic patients without postprandial hyperglycaemia (N = 88). P < 0.001 between the groups.

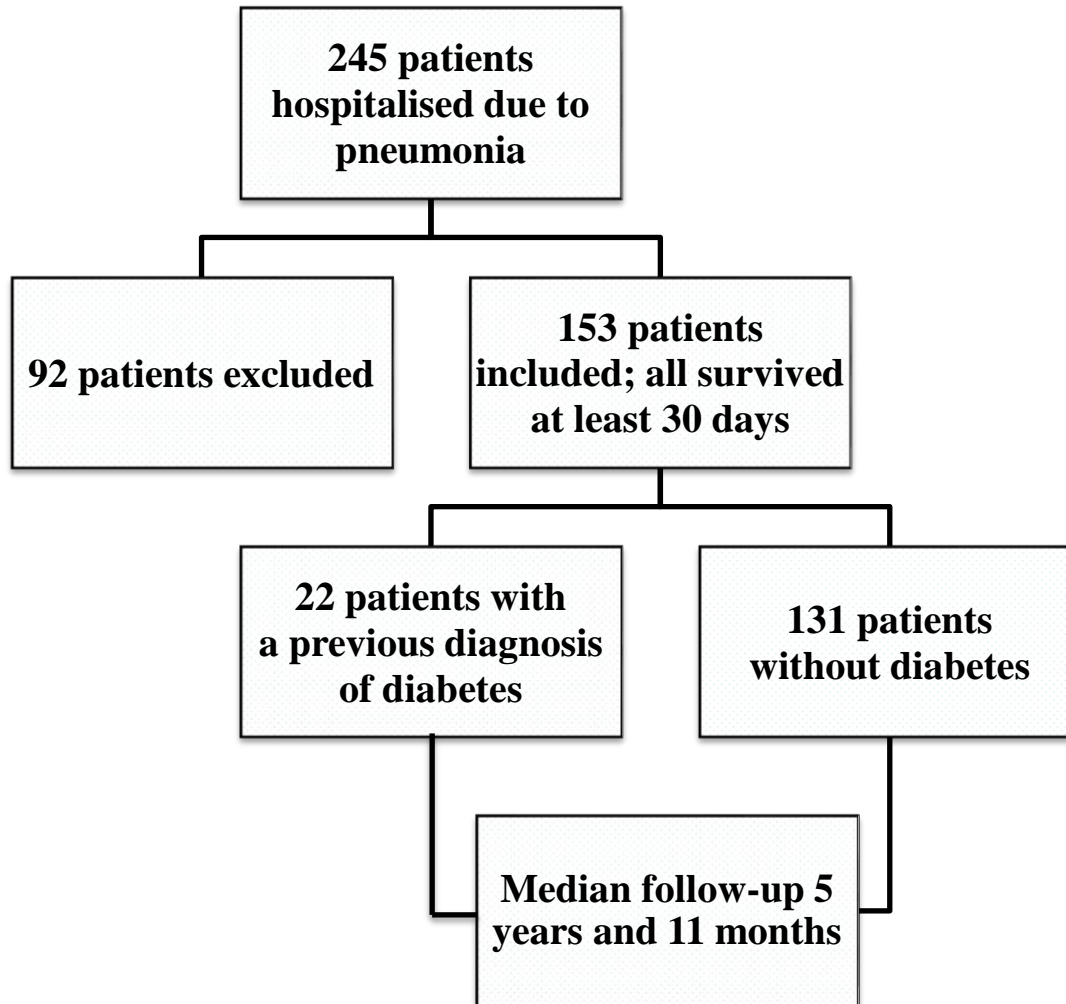

1  
2  
3  
4  
5  
6  
7  
8  
9  
10  
11  
12  
13  
14  
15  
16  
17  
18  
19  
20  
21  
22  
23  
24  
25  
26  
27  
28  
29  
30  
31  
32  
33  
34  
35  
36  
37  
38  
39  
40  
41  
42  
43  
44  
45  
46  
47  
48  
49  
50  
51  
52  
53  
54  
55  
56  
57  
58  
59  
60

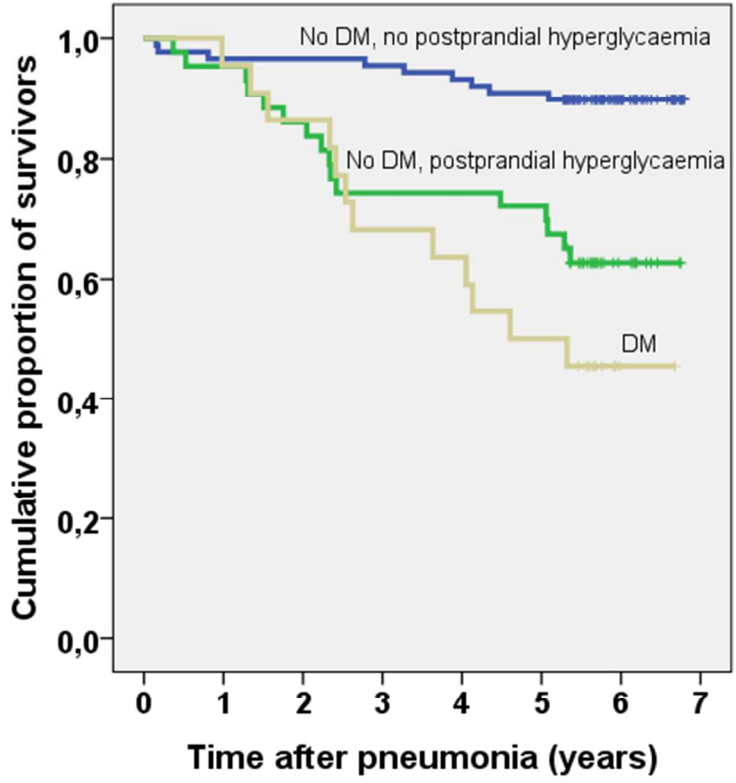

Figure 2  
220x176mm (72 x 72 DPI)

ew only

## STROBE Statement—checklist of items that should be included in reports of observational studies

|                              | Item No | Recommendation                                                                                                                                                                                                                                                                                                                                                                                                                                                                                                                                                                                                                                                                                          |
|------------------------------|---------|---------------------------------------------------------------------------------------------------------------------------------------------------------------------------------------------------------------------------------------------------------------------------------------------------------------------------------------------------------------------------------------------------------------------------------------------------------------------------------------------------------------------------------------------------------------------------------------------------------------------------------------------------------------------------------------------------------|
| <b>Title and abstract</b>    | 1       | (a) Indicate the study's design with a commonly used term in the title or the abstract PAGES 1, 2<br>(b) Provide in the abstract an informative and balanced summary of what was done and what was found PAGE 2                                                                                                                                                                                                                                                                                                                                                                                                                                                                                         |
| <b>Introduction</b>          |         |                                                                                                                                                                                                                                                                                                                                                                                                                                                                                                                                                                                                                                                                                                         |
| Background/rationale         | 2       | Explain the scientific background and rationale for the investigation being reported PAGE 4                                                                                                                                                                                                                                                                                                                                                                                                                                                                                                                                                                                                             |
| Objectives                   | 3       | State specific objectives, including any prespecified hypotheses PAGE 4                                                                                                                                                                                                                                                                                                                                                                                                                                                                                                                                                                                                                                 |
| <b>Methods</b>               |         |                                                                                                                                                                                                                                                                                                                                                                                                                                                                                                                                                                                                                                                                                                         |
| Study design                 | 4       | Present key elements of study design early in the paper PAGE 5                                                                                                                                                                                                                                                                                                                                                                                                                                                                                                                                                                                                                                          |
| Setting                      | 5       | Describe the setting, locations, and relevant dates, including periods of recruitment, exposure, follow-up, and data collection PAGE 5                                                                                                                                                                                                                                                                                                                                                                                                                                                                                                                                                                  |
| Participants                 | 6       | (a) <i>Cohort study</i> —Give the eligibility criteria, and the sources and methods of selection of participants. Describe methods of follow-up PAGE 5<br><i>Case-control study</i> —Give the eligibility criteria, and the sources and methods of case ascertainment and control selection. Give the rationale for the choice of cases and controls<br><i>Cross-sectional study</i> —Give the eligibility criteria, and the sources and methods of selection of participants<br>(b) <i>Cohort study</i> —For matched studies, give matching criteria and number of exposed and unexposed<br><i>Case-control study</i> —For matched studies, give matching criteria and the number of controls per case |
| Variables                    | 7       | Clearly define all outcomes, exposures, predictors, potential confounders, and effect modifiers. Give diagnostic criteria, if applicable PAGE 7                                                                                                                                                                                                                                                                                                                                                                                                                                                                                                                                                         |
| Data sources/<br>measurement | 8*      | For each variable of interest, give sources of data and details of methods of assessment (measurement). Describe comparability of assessment methods if there is more than one group PAGE 5                                                                                                                                                                                                                                                                                                                                                                                                                                                                                                             |
| Bias                         | 9       | Describe any efforts to address potential sources of bias PAGES 13,14                                                                                                                                                                                                                                                                                                                                                                                                                                                                                                                                                                                                                                   |
| Study size                   | 10      | Explain how the study size was arrived at PAGE 5                                                                                                                                                                                                                                                                                                                                                                                                                                                                                                                                                                                                                                                        |
| Quantitative variables       | 11      | Explain how quantitative variables were handled in the analyses. If applicable, describe which groupings were chosen and why PAGES 7, 8                                                                                                                                                                                                                                                                                                                                                                                                                                                                                                                                                                 |
| Statistical methods          | 12      | (a) Describe all statistical methods, including those used to control for confounding PAGES 7,8<br>(b) Describe any methods used to examine subgroups and interactions PAGES 7,9<br>(c) Explain how missing data were addressed PAGE 8<br>(d) <i>Cohort study</i> —If applicable, explain how loss to follow-up was addressed NO LOSS TO FOLLOW-UP<br><i>Case-control study</i> —If applicable, explain how matching of cases and controls was addressed<br><i>Cross-sectional study</i> —If applicable, describe analytical methods taking account of sampling strategy<br>(e) Describe any sensitivity analyses PAGE 8                                                                                |

Continued on next page

**Results**

|                  |     |                                                                                                                                                                                                                                                                                                                                                                                                                                                    |
|------------------|-----|----------------------------------------------------------------------------------------------------------------------------------------------------------------------------------------------------------------------------------------------------------------------------------------------------------------------------------------------------------------------------------------------------------------------------------------------------|
| Participants     | 13* | (a) Report numbers of individuals at each stage of study—eg numbers potentially eligible, examined for eligibility, confirmed eligible, included in the study, completing follow-up, and analysed PAGE 5<br>(b) Give reasons for non-participation at each stage PAGE 5<br>(c) Consider use of a flow diagram FIGURE 1                                                                                                                             |
| Descriptive data | 14* | (a) Give characteristics of study participants (eg demographic, clinical, social) and information on exposures and potential confounders TABLE 1<br>(b) Indicate number of participants with missing data for each variable of interest TABLE 1<br>(c) <i>Cohort study</i> —Summarise follow-up time (eg, average and total amount) PAGE 7                                                                                                         |
| Outcome data     | 15* | <i>Cohort study</i> —Report numbers of outcome events or summary measures over time PAGE 7<br><i>Case-control study</i> —Report numbers in each exposure category, or summary measures of exposure<br><i>Cross-sectional study</i> —Report numbers of outcome events or summary measures                                                                                                                                                           |
| Main results     | 16  | (a) Give unadjusted estimates and, if applicable, confounder-adjusted estimates and their precision (eg, 95% confidence interval). Make clear which confounders were adjusted for and why they were included PAGES 8,9, TABLES 2, 3<br>(b) Report category boundaries when continuous variables were categorized PAGE 8<br>(c) If relevant, consider translating estimates of relative risk into absolute risk for a meaningful time period PAGE 9 |
| Other analyses   | 17  | Report other analyses done—eg analyses of subgroups and interactions, and sensitivity analyses PAGE 10                                                                                                                                                                                                                                                                                                                                             |

**Discussion**

|                  |    |                                                                                                                                                                                    |
|------------------|----|------------------------------------------------------------------------------------------------------------------------------------------------------------------------------------|
| Key results      | 18 | Summarise key results with reference to study objectives PAGE 11                                                                                                                   |
| Limitations      | 19 | Discuss limitations of the study, taking into account sources of potential bias or imprecision. Discuss both direction and magnitude of any potential bias PAGES 13,14             |
| Interpretation   | 20 | Give a cautious overall interpretation of results considering objectives, limitations, multiplicity of analyses, results from similar studies, and other relevant evidence PAGE 14 |
| Generalisability | 21 | Discuss the generalisability (external validity) of the study results PAGES 13, 14                                                                                                 |

**Other information**

|         |    |                                                                                                                                                                       |
|---------|----|-----------------------------------------------------------------------------------------------------------------------------------------------------------------------|
| Funding | 22 | Give the source of funding and the role of the funders for the present study and, if applicable, for the original study on which the present article is based PAGE 15 |
|---------|----|-----------------------------------------------------------------------------------------------------------------------------------------------------------------------|

\*Give information separately for cases and controls in case-control studies and, if applicable, for exposed and unexposed groups in cohort and cross-sectional studies.

**Note:** An Explanation and Elaboration article discusses each checklist item and gives methodological background and published examples of transparent reporting. The STROBE checklist is best used in conjunction with this article (freely available on the Web sites of PLoS Medicine at <http://www.plosmedicine.org/>, Annals of Internal Medicine at <http://www.annals.org/>, and Epidemiology at <http://www.epidem.com/>). Information on the STROBE Initiative is available at [www.strobe-statement.org](http://www.strobe-statement.org).



# BMJ Open

## The long-term mortality after community-acquired pneumonia: Impacts of diabetes and newly discovered hyperglycaemia. A prospective, observational cohort study.

|                                 |                                                                                                                                                                                                                                                                                                                                                                                                                                                                                                                                              |
|---------------------------------|----------------------------------------------------------------------------------------------------------------------------------------------------------------------------------------------------------------------------------------------------------------------------------------------------------------------------------------------------------------------------------------------------------------------------------------------------------------------------------------------------------------------------------------------|
| Journal:                        | <i>BMJ Open</i>                                                                                                                                                                                                                                                                                                                                                                                                                                                                                                                              |
| Manuscript ID:                  | bmjopen-2014-005715.R1                                                                                                                                                                                                                                                                                                                                                                                                                                                                                                                       |
| Article Type:                   | Research                                                                                                                                                                                                                                                                                                                                                                                                                                                                                                                                     |
| Date Submitted by the Author:   | 17-Jul-2014                                                                                                                                                                                                                                                                                                                                                                                                                                                                                                                                  |
| Complete List of Authors:       | Koskela, Heikki; Kuopio University Hospital, Unit for Medicine and Clinical Research, department of respiratory medicine; University of Eastern Finland, School of Medicine, Institute of Clinical Sciences, Faculty of Health Sciences<br>Salonen, Pivi; Kuopio University Hospital, Unit for Medicine and Clinical Research, Respiratory Medicine<br>Romppanen, Jarkko; Eastern Finland Laboratory Centre,<br>Niskanen, Leo; University of Eastern Finland, School of Medicine, Institute of Clinical Sciences, Faculty of Health Sciences |
| <b>Primary Subject Heading</b>: | Respiratory medicine                                                                                                                                                                                                                                                                                                                                                                                                                                                                                                                         |
| Secondary Subject Heading:      | Diabetes and endocrinology, Infectious diseases                                                                                                                                                                                                                                                                                                                                                                                                                                                                                              |
| Keywords:                       | Diabetes & endocrinology < INTERNAL MEDICINE, Thoracic medicine < INTERNAL MEDICINE, Adult thoracic medicine < THORACIC MEDICINE, Respiratory infections < THORACIC MEDICINE                                                                                                                                                                                                                                                                                                                                                                 |
|                                 |                                                                                                                                                                                                                                                                                                                                                                                                                                                                                                                                              |

SCHOLARONE™  
Manuscripts

1  
2  
3 **The long-term mortality after community-acquired pneumonia: Impacts of diabetes and newly**  
4 **discovered hyperglycaemia. A prospective, observational cohort study.**  
5

6 Running title: Pneumonia and hyperglycaemia  
7

8 Heikki O Koskela, MD <sup>1</sup>, Päivi H Salonen, MD <sup>2</sup>, Jarkko Romppanen, MD <sup>3</sup>, Leo Niskanen, MD <sup>4</sup>  
9

10  
11  
12 <sup>1</sup> Unit for Medicine and Clinical Research, Pulmonary Division, Kuopio University Hospital, PB 1777, 70211  
13 Kuopio, Finland and School of Medicine, Institute of Clinical Sciences, Faculty of Health Sciences, University  
14 of Eastern Finland, PB 1627, 70211 Kuopio, Finland  
15

16 <sup>2</sup> Unit for Medicine and Clinical Research, Pulmonary Division, Kuopio University Hospital, PB 1777, 70211  
17 Kuopio, Finland  
18

19 <sup>3</sup> Eastern Finland Laboratory Centre, PB 1700, 70211 Kuopio, Finland  
20

21 <sup>4</sup> School of Medicine, Institute of Clinical Sciences, Faculty of Health Sciences, University of Eastern Finland,  
22 PB 1627, 70211 Kuopio, Finland and Finnish Medicines Agency Fimea, PB 55, 00034 FIMEA, Helsinki, Finland  
23

24  
25  
26 Corresponding author: Heikki O Koskela

27  
28 Unit for Medicine and Clinical Research, Pulmonary Division, Kuopio University Hospital, Kuopio, Finland

29  
30 Postal address: PL 1777, 70211 Kuopio, FINLAND

31  
32 e-mail: heikki.koskela@kuh.fi  
33

34  
35 Key words: Pneumonia, pneumonia mortality, diabetes, hyperglycaemia  
36  
37

38  
39 Word count:  
40  
41  
42  
43  
44  
45  
46  
47  
48  
49  
50  
51  
52  
53  
54  
55  
56  
57  
58  
59  
60

**ABSTRACT**

**Objectives** Community-acquired pneumonia is associated with a significant long-term mortality after initial recovery. It has been acknowledged that additional research is urgently needed to examine the contributors to this long-term mortality. The objective of the present study was to assess whether diabetes or newly discovered hyperglycaemia during pneumonia affects the long-term mortality.

**Design:** A prospective, observational cohort study

**Setting:** A single secondary centre in eastern Finland

**Participants:** 153 consecutive hospitalised patients who survived at least 30 days after mild to moderate community-acquired pneumonia.

**Interventions:** Plasma glucose levels were recorded seven times during the first day on the ward. Several possible confounders were also recorded. The surveillance status and causes of death were recorded after median of five years and eleven months.

**Results** In multivariate Cox regression analysis, a previous diagnosis of diabetes among the whole population (adjusted hazard ratio 2.84 (1.35 – 5.99)) and new postprandial hyperglycaemia among the non-diabetic population (adjusted hazard ratio 2.56 (1.04 – 6.32)) showed independent associations with late mortality. New fasting hyperglycaemia was not an independent predictor. The mortality rates at the end of follow-up were 54 %, 37 %, and 10 % among patients with diabetes, non-diabetic patients with new postprandial hyperglycaemia, and non-diabetic patients without postprandial hyperglycaemia, respectively ( $p < 0.001$ ). The underlying causes of death roughly mirrored those in Finnish general population with a slight excess in mortality due to chronic respiratory diseases. Pneumonia was the immediate cause of death in just 8 % of all late deaths.

**Conclusions** A previous diagnosis of diabetes and newly discovered postprandial hyperglycaemia increase the risk of death for several years after community-acquired pneumonia. As the knowledge about patient subgroups with an increased late mortality risk is gradually gathering, more studies are needed to evaluate the possible post-pneumonia interventions to reduce the late mortality.

**Strengths and limitations of the study**

- The plasma glucose levels were carefully measured during pneumonia with seven plasma glucose measurements during the first day on ward
- The prospective nature of the study provided comprehensive collection of information about possible confounders
- The main limitation is the lack of validated pneumonia severity scoring although several pneumonia severity-related variables were collected
- The present population consists of patients with mild to moderate CAP. Therefore, the results cannot be generalised to all hospitalised pneumonia patients.

For peer review only

## INTRODUCTION

Pneumonia is the leading cause of infectious death worldwide with 3.2 million annual casualties.[1] This figure, which is impressive enough *per se*, only contains the acute mortality. Pneumonia is also associated with significant late mortality up to several years afterwards among patients who survive the initial episode. In a large population-based cohort study, the mortality rate was 53 % at five years after an episode of community-acquired pneumonia (CAP).[2] Importantly, the long-term mortality is substantially higher than that of either the general population or a control population hospitalised for reasons other than CAP.[3-5] Given the high and rising incidence of CAP, its long-acting effect on mortality should be regarded as major public health threat.[6 7] It has been acknowledged that additional research is urgently needed to examine the contributors to this long-term mortality.[8]

Probably the most consistently identified contributor to late mortality after CAP is the presence of comorbid conditions, especially neurodegenerative disorders, cardiovascular conditions, malignancy, and chronic obstructive lung disease.[7] To the best of our knowledge, diabetes has not been investigated in this respect. Yende *et al.* analysed two large CAP cohorts and found out that diabetes increased the mortality rate within the first year after CAP with unadjusted hazard ratios (HR) of 1.4 - 1.9.[9] They suggested that the higher mortality may be due to worsening of pre-existing cardiovascular disease or higher risk of acute kidney injury. However, the early and late deaths were not analysed separately and the follow-up time was relatively short.

Hyperglycaemia is associated with short-term mortality in several acute disorders including CAP.[10-14] In pneumonia, a newly detected hyperglycaemia among non-diabetic patients seems to increase the short-term mortality rate more than hyperglycaemia among diabetic patients.[13] The impact of new, pneumonia-associated hyperglycaemia on the long-term mortality has not been investigated. The objective of the present study was to assess whether diabetes or newly discovered hyperglycaemia among non-diabetics affects the late mortality after CAP.

## METHODS

### Study design and the population

1  
2  
3 This prospective, observational cohort study was carried out at Kuopio University Hospital in Finland. From  
4 November 2006 to May 2008 all adult patients admitted to the pulmonology ward due to CAP were  
5 recruited. The patients were considered to have pneumonia if they had an acute febrile illness with a new  
6 radiographic shadowing. During that time 245 patients were hospitalised because of pneumonia (figure 1).  
7 Patients were excluded from this study if they had severe pneumonia requiring treatment in the intensive  
8 care unit, if they could not give informed consent due to confusion, or if their antibiotic treatment had  
9 already been started on another institution. Altogether 92 patients were excluded and 153 patients  
10 included. All the 153 patients survived at least 30 days after admission. Among them, 22 had a previous  
11 diagnosis of diabetes (table 1).  
12  
13  
14  
15  
16  
17  
18  
19  
20

### 21 **Measurements during pneumonia**

22  
23  
24  
25 During the first 24 hours on the ward the plasma glucose was determined seven times, at three o'clock at  
26 night, before breakfast, before lunch, after lunch, before dinner, after dinner, and at bedtime. In addition,  
27 the family history for diabetes and the pre-pneumonia Karnofsky performance score were assessed.  
28 Karnofsky score is a general measure of patient independence which has most often utilised in patients  
29 with cancer.[15 16] Height, weight, waist circumference, oxygen saturation, blood pressure, temperature,  
30 and heart rate were measured. Blood tests included glycosylated haemoglobin A1c (HbA1c), N-terminal pro  
31 B-type natriuretic peptide (NT-proBNP), C-reactive protein, leukocytes, urea, and arterial blood gas analysis.  
32  
33  
34  
35  
36  
37  
38  
39

40 The detailed description of the methods and the baseline results have been published.[17] However, the  
41 NT-proBNP analysis will be described here for the first time. It was added to the present study since it has  
42 been shown to associate with pneumonia prognosis.[18] It was measured from the blood sample collected  
43 at admission utilising a commercially available electrochemiluminescence immunoassay (Roche Diagnostics  
44 GmbH, Mannheim, Germany). Elevated NT-proBNP was defined as plasma concentration above 450 ng/l  
45 for patients younger than 50 years, above 900 ng/l for patients aged 50 – 75 years and above 1800 ng/ml  
46 for patients older than 75 years.[19]  
47  
48  
49  
50  
51  
52  
53  
54  
55  
56  
57  
58  
59  
60

Table 1. Patient characteristics

|                                | Diabetic patients (N = 22) | p <sup>a</sup> | Patients without diabetes (N = 131)  |                                         | p <sup>b</sup> | Patients with missing data |
|--------------------------------|----------------------------|----------------|--------------------------------------|-----------------------------------------|----------------|----------------------------|
|                                |                            |                | Postprandial hyperglycaemia (n = 43) | No postprandial hyperglycaemia (n = 88) |                |                            |
| Age, yrs                       | 66 (59 - 73)               | 0.04           | 66 (60 - 71)                         | 53 (49 - 58)                            | 0.001          | 0                          |
| Male gender                    | 68 %                       | 0.40           | 67 %                                 | 54 %                                    | 0.16           | 0                          |
| Family history of diabetes     | 68 %                       | 0.004          | 47 %                                 | 30 %                                    | 0.07           | 14                         |
| BMI, kg/m <sup>2</sup>         | 33 (28 - 37)               | 0.001          | 27 (25 - 29)                         | 27 (26 - 29)                            | 0.56           | 0                          |
| Waist circumference, cm        | 110 (102 - 118)            | <0.001         | 100 (95 - 104)                       | 97 (94 - 100)                           | 0.27           | 18                         |
| gHbA1c, %                      | 7.83 (6.97 - 8.69)         | <0.001         | 6.12 (5.79 - 6.44)                   | 5.64 (5.53 - 5.76)                      | <0.001         | 7                          |
| Karnofsky 80% or less          | 50 %                       | 0.02           | 44 %                                 | 16 %                                    | <0.001         | 0                          |
| Three or more comorbidities    | 54 %                       | <0.001         | 23 %                                 | 14 %                                    | 0.17           | 0                          |
| Diastolic blood pressure, mmHg | 75 (69 - 81)               | 0.12           | 81 (75 - 86)                         | 80 (77 - 84)                            | 0.99           | 1                          |
| Heart rate, 1/min              | 99 (90 - 109)              | 0.22           | 100 (92 - 107)                       | 91 (86 - 95)                            | 0.005          | 1                          |
| Oxygen saturation (%)          | 92 (89 - 94)               | 0.35           | 91 (89 - 93)                         | 94 (93 - 95)                            | 0.004          | 13                         |
| Leukocytes, 10 <sup>9</sup> /l | 11.8 (9.6 - 13.9)          | 0.46           | 12.4 (10.6 - 14.3)                   | 11.7 (10.1 - 13.3)                      | 0.10           | 0                          |
| Urea, mmol/l                   | 6.88 (4.96 - 8.79)         | 0.28           | 8.61 (6.41 - 10.8)                   | 4.72 (4.00 - 5.44)                      | <0.001         | 11                         |
| CRP, mg/l                      | 164 (119 - 209)            | 0.97           | 228 (166 - 289)                      | 146 (127 - 165)                         | <0.001         | 1                          |
| Elevated NT-proBNP             | 32 %                       | 0.51           | 29 %                                 | 23 %                                    | 0.47           | 4                          |
| Length of hospital stay, days  | 5.8 (4.6 - 7.1)            | 0.53           | 6.6 (5.7 - 7.5)                      | 5.9 (5.2 - 6.6)                         | 0.03           | 1                          |

BMI, body mass index; gHbA1c, glycosylated haemoglobin A1c expressed as percentage of total haemoglobin; CRP, C-reactive protein; NT-proBNP, plasma N-terminal pro B-type natriuretic peptide. The data is presented either as percentage of patients showing the feature or means (95 % confidence intervals)

<sup>a</sup> p value indicates the differences between diabetic and non-diabetic patients

<sup>b</sup> p value indicates the differences between the patients with and without postprandial hyperglycaemia within the non-diabetic patients.

## Definitions

Diabetes was defined as doctor's diagnosis of diabetes which had been set before the current pneumonia episode, and verified from the patient files. New hyperglycaemia was defined as hyperglycaemia during the first 24 hours of pneumonia hospitalisation in a patient without a doctor's diagnosis of diabetes. Fasting hyperglycaemia was defined as hyperglycaemia detected at three o'clock at night or at seven o'clock in the morning before breakfast. Postprandial hyperglycaemia was defined as hyperglycaemia detected during the daytime or in the evening. The cut-off values for both fasting and postprandial hyperglycaemia among the non-diabetic patients were those defined by the receiver operator curves (ROC) analysis (see below). The main outcome variable was mortality from 30 days after pneumonia up to the end of follow-up. The predictor variables were diabetes, new fasting hyperglycaemia, and new postprandial hyperglycaemia. A confounder was a variable which showed an association with both the plasma glucose levels during pneumonia and the late mortality. However, a potential confounder with a causal relationship to the outcome variable was not included. Furthermore, if two potential confounders were closely interrelated, the one with a closer association with the plasma glucose levels was included.

## Follow-up after pneumonia

In September 2013 the survival status was obtained in all patients from the National Statistical Service of Finland. The immediate and underlying causes of death, according to the International Classification of Diseases version 10, were obtained from death certificates. The median follow-up was five years and eleven months.

## Ethics

The study was reviewed by the Research Ethic Committee, Hospital District of Northern Savo (75//2006 ) and it was performed in accordance with the ethical standards laid down on the 2000 Declaration of Helsinki. All patients gave their written informed consent.



## Statistical analysis

Comparative survival curves were constructed using Kaplan-Meier methodology. The unadjusted HRs were assessed utilising univariate Cox regression analysis. Continuous data was divided to quartiles. The assumption of proportional hazard was checked by graphically comparing the hazard curves. To determinate the adjusted HRs for diabetes, new fasting hyperglycaemia and new postprandial hyperglycaemia, Cox multivariate regression analysis with backwards directed stepwise procedure was utilised. In this analysis patients with missing data were excluded.

The analysis about the effect of new hyperglycaemia was restricted to the 131 non-diabetic pneumonia patients. Among them, ROC curves were produced for both fasting and postprandial plasma glucose values to define the best cut-off values to predict death during the follow-up.

Frequency comparison was performed by Chi-squared test. Student's T-test and Pearson correlation coefficient were utilised when appropriate. Categorical data is expressed as percentages and continuous data as means and 95 % confidence intervals (CI). Statistical significance was defined as a p-value of < 0.05. Analyses were performed using SPSS V.19.0 for the personal computer (SPSS, Inc. Chicago, Illinois, USA).

## RESULTS

### Univariate analysis and the ROC analysis

Table 1 shows the numbers of patients in each subgroup and their characteristics. The following features showed a statistically significant association with the late mortality within the whole population: Presence of diabetes (HR 3.5 (1.7 - 6.9), figure 2), advanced age, Karnofsky score equal or less than 80 %, presence of three or more co-morbidities, low diastolic blood pressure, low arterial blood oxygen saturation, high urea,

1  
2  
3 NT-proBNP above predicted value[19], high gHbA1c, and long hospital stay (data not shown). The  
4 proportional hazards remained constant over time.  
5

6  
7 Among the non-diabetic patients, the ROC analysis of the fasting plasma glucose measurements revealed  
8 that the level of 7.05 mmol/l was the best cut-off value to predict late mortality (results not shown). A  
9 glucose level exceeding it showed an unadjusted HR of 2.7 (1.1 – 6.4) ( $p = 0.027$ ). 52 % of the non-diabetic  
10 patients showed a fasting glucose level exceeding 7.05 mmol/l. In one patient, no fasting glucose values  
11 were obtained. The ROC analysis of the postprandial glucose measurements revealed that the level of  
12 10.75 mmol/l was the best cut-off value (results not shown). The corresponding unadjusted HR was 4.2 (1.9  
13 – 9.6) ( $p = 0.001$ , figure 2). 33 % of the non-diabetic patients showed a postprandial glucose level exceeding  
14 10.75 mmol/l. Utilising these plasma glucose cut-off values among the 22 diabetic patients it could be  
15 shown that 19 of them (86 %) showed fasting hyperglycaemia and 18 (82 %) showed postprandial  
16 hyperglycaemia.  
17  
18  
19  
20  
21  
22  
23  
24  
25

### 26 **Multivariate analysis**

27  
28  
29  
30  
31 The following confounders were included: Age, Karnofsky score equal or less than 80%, elevated plasma  
32 NT-proBNP, and plasma urea concentration. The results of the multivariate Cox regression analysis are  
33 shown in tables 2 and 3. It can be seen that a diagnosis of diabetes among the whole population (table 2)  
34 and new postprandial hyperglycaemia among the non-diabetic population (table 3) showed independent  
35 associations with late mortality after pneumonia. New fasting hyperglycaemia was not a predictor of  
36 mortality when the confounders were taken into account ( $p = 0.74$ ).  
37  
38  
39  
40  
41  
42  
43

### 44 **The mortality rates and the causes of death**

45  
46  
47  
48  
49 The mortality rates at the end of follow-up were 54 %, 37 %, and 10 % among patients with diabetes, non-  
50 diabetic patients with new postprandial hyperglycaemia, and non-diabetic patients without postprandial  
51 hyperglycaemia, respectively ( $p < 0.001$ ). The underlying causes of death are shown in table 4. The  
52 immediate causes of death mirrored the underlying causes. Pneumonia was the immediate cause of death  
53 in just three cases (8 % of all deaths).  
54  
55  
56  
57  
58  
59  
60

Table 2. Cox multivariate regression analysis with backward directed stepwise procedure about the effect of diabetes on the risk of late death after pneumonia. The included confounders were age, Karnofsky score equal or less than 80%, elevated plasma NT-proBNP, and plasma urea concentration. Only factors with at least suggestive independent association ( $p < 0.10$ ) with the risk of late death are presented. N = 142 (one diabetic and ten non-diabetic patients were excluded due to lack of urea measurements).

|                                  | <b>Adjusted hazard ratio</b> | <b>95 % CI</b> | <b>P value</b> |
|----------------------------------|------------------------------|----------------|----------------|
| Diabetes                         | 2.84                         | 1.35 – 5.99    | 0.006          |
| Karnofsky equal or less than 80% | 4.19                         | 1.86 – 9.46    | 0.001          |
| Age, years                       | 1.53*                        | 1.00 – 2.34    | 0.048          |
| Urea, mmol/L                     | 1.78*                        | 1.20 - 2.64    | 0.004          |

\*Hazard ratio is expressed per quartile

Table 3. Cox multivariate regression analysis with backward directed stepwise procedure about the effect of new postprandial hyperglycaemia on the risk of late death after pneumonia. The included confounders were age, Karnofsky score equal or less than 80%, elevated plasma NT-proBNP, and plasma urea concentration. Only factors with at least suggestive independent association ( $p < 0.10$ ) with the risk of late death are presented. N = 131, only the non-diabetic patients were included.

|                                  | <b>Adjusted hazard ratio</b> | <b>95 % CI</b> | <b>P value</b> |
|----------------------------------|------------------------------|----------------|----------------|
| New postprandial hyperglycaemia  | 2.56                         | 1.04 – 6.32    | 0.041          |
| Karnofsky equal or less than 80% | 3.26                         | 1.12 – 9.47    | 0.030          |
| Age, years                       | 1.97*                        | 1.14 – 3.39    | 0.015          |

\*Hazard ratio is expressed per quartile

Table 4. The underlying causes of late death

| Group                                                     | Cancer   | Cardiovascular | Obstructive lung diseases | Miscellaneous |
|-----------------------------------------------------------|----------|----------------|---------------------------|---------------|
| No diabetes, no postprandial hyperglycaemia (9 deaths)    | 2 (22 %) | 4 (44 %)       | 0 (0 %)                   | 3 (33 %)      |
| No diabetes, with postprandial hyperglycaemia (16 deaths) | 1 (6 %)  | 4 (25 %)       | 7 (44 %)                  | 4 (25 %)      |
| Diabetes (11 deaths)                                      | 3 (27 %) | 6 (54 %)       | 0 (0 %)                   | 2 (18 %)      |
| All patients (36 deaths)                                  | 6 (17 %) | 14 (39 %)      | 7 (19 %)                  | 9 (25 %)      |

## DISCUSSION

The present study confirms that both the pre-pneumonia health status and the severity of pneumonia are associated with the late mortality after CAP.[7] Especially, the weight of low functional status was highlighted by the strong association between low Karnofsky score and late mortality. These features were taken into account in the present study. It showed that a pre-pneumonia diagnosis of diabetes is associated with a three-fold increase in the risk of death up to six years after mild to moderate CAP. The study thus corroborates and extends the findings of Yende et al, who reported of increased mortality rates in diabetic patients up to one year after pneumonia.[9] The present study also demonstrated that new postprandial hyperglycaemia among non-diabetic patients shows an independent association with late mortality after pneumonia. Such an association has not been described earlier.

1  
2  
3 In acute illnesses, complex mechanisms involving hormones and cytokines lead to hyperglycaemia which is  
4 mainly caused by excessive hepatic glucose production and manifested by high fasting glucose values.[12]  
5  
6 This probably explains our finding that fasting hyperglycaemia was more common than postprandial  
7 hyperglycaemia among the non-diabetic CAP patients. As fasting hyperglycaemia was not an independent  
8 predictor of mortality in the present study, it may be regarded as an adequate body response to infection.  
9  
10 Postprandial hyperglycaemia, in turn, is considered as the first step in the deterioration of glucose  
11 homeostasis.[20] In the present study, the survival curves of the diabetic patients and the non-diabetic  
12 patients with postprandial hyperglycaemia were almost identical up to 2.5 years. There is evidence  
13 suggesting that postprandial hyperglycaemia is an independent risk factor for cardiovascular disease,  
14 stroke, retinopathy, renal failure, and neurologic complications in both diabetic and non-diabetic  
15 individuals.[20] Excess late mortality after CAP can now be added to that list.  
16  
17  
18  
19  
20  
21  
22  
23

24 One may suspect that the hyperglycaemic patients without a previous, doctor's diagnosis of diabetes may  
25 actually have suffered from diabetes without knowing it. HbA1c reflects mean blood glucose levels during  
26 the previous 2 – 3 months and can be used to diagnose diabetes.[21] It is true that the HbA1c values were  
27 higher in the non-diabetic patients with new postprandial hyperglycaemia than in those without it.  
28  
29 However, the 95 % confidence interval of their HbA1c values was below 6.5 % which is considered  
30 diagnostic for diabetes[21] and also well below the HbA1c values of the diabetic patients. In addition, the  
31 patients with new postprandial hyperglycaemia did not differ from the euglycaemic non-diabetic patients  
32 with respect to family history of diabetes, body mass index, or waist circumference. On the contrary, the  
33 patients with a doctor's diagnosis of diabetes clearly differed from the rest of the population by showing all  
34 these typical features of type 2 diabetes.[22] Therefore, most of the CAP patients with new postprandial  
35 hyperglycaemia probably did not have an undiagnosed diabetes before pneumonia. This supports the view  
36 that stress hyperglycaemia and diabetes are two separate disorders.[12 17 23]  
37  
38  
39  
40  
41  
42  
43  
44  
45  
46

47 The commonly used plasma glucose cut-off values for transient hyperglycaemia during illness (stress  
48 hyperglycaemia) have been adopted from the diabetes diagnostics (fasting glucose > 6.9 mmol/l or random  
49 glucose > 11.1 mmol/l).[12] To our knowledge, they have not been validated in stress hyperglycaemia. As  
50 mentioned, diabetes and stress hyperglycaemia are two separate disorders. The present material gave an  
51 opportunity to define plasma glucose cut-off values that best predicted late mortality among the non-  
52 diabetic patients: 7.05 mmol/l for fasting glucose and 10.75 mmol/l for postprandial glucose. Our values  
53 were surprisingly close to those adopted from diabetes diagnostics and thus support their use also among  
54  
55  
56  
57  
58  
59  
60

1  
2  
3 non-diabetic patients with stress hyperglycaemia. Utilising the cut-off values from the diabetes diagnostics  
4 would not have changed the results of the present study.  
5  
6  
7  
8

9  
10 The present paper provides some new information how to identify patients at increased risk of death late  
11 after CAP. However, it is not known whether the identification of such patients can influence their long-  
12 term prognosis. Streptococcus pneumonia vaccination after CAP may be of limited value since just 8 % of all  
13 late deaths were caused by pneumonia in the present study. This is in accordance with a larger study in  
14 which just 6 % of short-term survivors from CAP finally died of pneumonia.[5] The underlying causes of  
15 death in the present population roughly mirrored those in Finnish general population [24] with one  
16 exception: In the general population, the proportion of a chronic lung disease as the underlying cause of  
17 death is 4 % but in the present population it was 19 %. The above-mentioned Dutch study reported exactly  
18 the same finding with much higher numbers of deaths.[5] This may be, at least partly, due to patients with  
19 obstructive lung diseases being prone to catch CAP and prone to be hospitalised in case of CAP.[25]  
20  
21  
22  
23  
24  
25  
26  
27  
28

29 If the possibilities for secondary interventions are to be established, the focus should perhaps be in the  
30 primary prevention of pneumonia. The present study suggests that pneumococcus vaccination should be  
31 focused on diabetic patients, aged patients, and those with low performance status, among other groups  
32 previously reported to show an excessive long-term mortality after pneumonia.[7 26]  
33  
34  
35  
36  
37  
38

39 The main strength of the present study was the careful way to detect hyperglycaemia during pneumonia  
40 with seven plasma glucose measurements during the first day on ward, also including night-time  
41 measurements. Most previous studies about the effects of hyperglycaemia on pneumonia prognosis are  
42 handicapped by the small number, usually one, of plasma glucose measurements. Plasma glucose levels  
43 vary markedly within a day during an acute illness and a single measurement can easily miss the highest  
44 values.[17 23] Frequent glucose measurements explain the higher prevalence of new hyperglycaemia in the  
45 present study compared with the previous ones.[10 11] The prospective nature and the comprehensive  
46 collection of information about possible confounders may also be considered as strengths.  
47  
48  
49  
50  
51  
52  
53  
54

55 The main limitation of the present study was the lack of validated pneumonia severity scoring. The  
56 management of the present patients was based on local guidelines. The Finnish pneumonia guideline  
57 suggested the use of a validated severity score not until autumn 2008 [27], i.e., after the present patient  
58  
59  
60

1  
2  
3 population had been collected. The lack of systematic recording of respiratory rate precludes the  
4 calculation of any validated severity scores afterwards. However, many severity-related variables like  
5 oxygen saturation, temperature, blood pressure, heart rate, C-reactive protein, leukocytes, urea, and  
6 arterial blood gas analysis, were recorded. The population did not include patients who were confused and  
7 patients who needed treatment in intensive care unit. The present population thus consists of patients with  
8 mild to moderate CAP. Therefore, the results cannot be generalised to all hospitalised pneumonia patients.  
9 The relatively small number of patients and deaths may also decrease the generalisability of the results.  
10  
11  
12  
13

14  
15  
16  
17 In conclusion, a previous diagnosis of diabetes and newly discovered postprandial hyperglycaemia may  
18 increase the risk of death for several years after CAP. As the knowledge about patient subgroups with an  
19 increased late mortality risk is gradually gathering, more studies are needed to evaluate the possible post-  
20 pneumonia interventions to reduce the late mortality.  
21  
22  
23  
24  
25  
26  
27  
28  
29  
30  
31  
32  
33  
34  
35  
36  
37  
38  
39  
40  
41  
42  
43  
44  
45  
46  
47  
48  
49  
50  
51  
52  
53  
54  
55  
56  
57  
58  
59  
60

### Acknowledgements

We thank all the nurses on the respiratory medicine ward of Unit of Medicine and Clinical Research, Kuopio University Hospital, for measuring the plasma glucose values.

### Funding

The study was mainly funded by the Hospital District of Northern Savo. In addition, Päivi Salonen has received funding from Finnish Anti-Tuberculosis Association Foundation and Pulmonary Foundation in Kuopio Area. The funding sources have no involvement in study design; in collection, analysis, or interpretation of data; in the writing of the report; or in the decision to submit the manuscript for publication.

### Competing interests

The authors have no competing interests

### Ethics approval

The study was reviewed by the Research Ethic Committee, Hospital District of Northern Savo (75//2006 ) and it was performed in accordance with the ethical standards laid down on the 2000 Declaration of Helsinki. All patients gave their written informed consent.

### Contributions

Heikki Koskela has made substantial contributions to conception and design, acquisition of data, and analysis and interpretation of data; He has written the article and is the guarantor.

Päivi Salonen has made substantial contributions to conception and design, acquisition of data, and analysis and interpretation of data. She has revised the article critically for important intellectual content and provided final approval of the version to be published.

Jarkko Romppanen has made substantial contributions to conception and design, acquisition of data, and analysis and interpretation of data. He has revised the article critically for important intellectual content and provided final approval of the version to be published.

Leo Niskanen has made substantial contributions to conception and design, acquisition of data, and analysis and interpretation of data. He has revised the article critically for important intellectual content and provided final approval of the version to be published.



## Data sharing statement

Extra data is available by emailing Heikki Koskela

## REFERENCES

1. World Health Organization. The top 10 causes of death 2011. Secondary The top 10 causes of death 2011 2013. <http://who.int/mediacentre/factsheets/fs310/en/>. Access date 16.05.2014
2. Johnstone J, Eurich DT, Majumdar SR, et al. Long-term morbidity and mortality after hospitalization with community-acquired pneumonia: a population-based cohort study. *Medicine (Baltimore)* 2008;87:329-34.
3. Koivula I, Sten M, Makela PH. Prognosis after community-acquired pneumonia in the elderly: a population-based 12-year follow-up study. *Arch Intern Med* 1999;159:1550-5.
4. Kaplan V, Clermont G, Griffin MF, et al. Pneumonia: still the old man's friend? *Arch Intern Med* 2003;163:317-23.
5. Bruns AH, Oosterheert JJ, Cucciolillo MC, et al. Cause-specific long-term mortality rates in patients recovered from community-acquired pneumonia as compared with the general Dutch population. *Clin Microbiol Infect* 2011;17:763-8.
6. Ewig S, Torres A. Community-acquired pneumonia as an emergency: time for an aggressive intervention to lower mortality. *Eur Respir J* 2011;38:253-60.
7. Restrepo MI, Faverio P, Anzueto A. Long-term prognosis in community-acquired pneumonia. *Curr Opin Infect Dis* 2013;26:151-8.
8. Mortensen EM. Potential causes of increased long-term mortality after pneumonia. *Eur Respir J* 2011;37:1306-7.
9. Yende S, van der Poll T, Lee M, et al. The influence of pre-existing diabetes mellitus on the host immune response and outcome of pneumonia: analysis of two multicentre cohort studies. *Thorax* 2010;65:870-7.
10. Kinzel T, Smith M. Hyperglycemia as a predictor for mortality in veterans with pneumonia. *Exp Aging Res* 1988;14:99-102.
11. McAlister FA, Majumdar SR, Blitz S, et al. The relation between hyperglycemia and outcomes in 2,471 patients admitted to the hospital with community-acquired pneumonia. *Diabetes Care* 2005;28:810-5.
12. Dungan KM, Braithwaite SS, Preiser JC. Stress hyperglycaemia. *Lancet* 2009;373:1798-807.

13. Rueda AM, Ormond M, Gore M, et al. Hyperglycemia in diabetics and non-diabetics: effect on the risk for and severity of pneumococcal pneumonia. *J Infect* 2010;60:99-105.
14. Lepper PM, Ott S, Nuesch E, et al. Serum glucose levels for predicting death in patients admitted to hospital for community acquired pneumonia: prospective cohort study. *BMJ* 2012;344:e3397.
15. Karnofsky DA, Burchenal JH. The clinical evaluation of chemotherapeutic agents in cancer. In: Macleod CM, ed. *Evaluation of chemotherapeutic agents*. New York: Columbia University Press, 1949:191-205.
16. Yates JW, Chalmer B, McKegney FP. Evaluation of patients with advanced cancer using the Karnofsky performance status. *Cancer* 1980;45:2220-4.
17. Salonen PH, Koskela HO, Niskanen L. Prevalence and determinants of hyperglycaemia in pneumonia patients. *Scand J Infect Dis* 2013;45:88-94.
18. Kruger S, Papassotiriou J, Marre R, et al. Pro-atrial natriuretic peptide and pro-vasopressin to predict severity and prognosis in community-acquired pneumonia : Results from the German competence network CAPNETZ. *Intensive Care Med* 2007;33:2069-78.
19. Januzzi JL, van Kimmenade R, Lainchbury J, et al. NT-proBNP testing for diagnosis and short-term prognosis in acute destabilized heart failure: an international pooled analysis of 1256 patients: the International Collaborative of NT-proBNP Study. *Eur Heart J* 2006;27:330-7.
20. Gerich J. Pathogenesis and management of postprandial hyperglycemia: role of incretin-based therapies. *Int J Gen Med* 2013;6:877-95.
21. Standards of medical care in diabetes--2013. *Diabetes Care* 2013;36 S11-66.
22. Noble D, Mathur R, Dent T, et al. Risk models and scores for type 2 diabetes: systematic review. *BMJ* 2011;343:d7163.
23. Koskela HO, Salonen PH, Niskanen L. Hyperglycaemia during exacerbations of asthma and chronic obstructive pulmonary disease. *Clin Respir J* 2013;7:382-9.
24. National Statistical Service of Finland. The causes of death 2012. [https://tilastokeskus.fi/til/ksyyt/2012/ksyyt\\_2012\\_2013-12-30\\_tie\\_001\\_fi.html](https://tilastokeskus.fi/til/ksyyt/2012/ksyyt_2012_2013-12-30_tie_001_fi.html). Access date 16.05.2014
25. Farr BM, Sloman AJ, Fisch MJ. Predicting death in patients hospitalized for community-acquired pneumonia. *Ann Intern Med* 1991;115:428-36.
26. Blasi F, Mantero M, Santus P, et al. Understanding the burden of pneumococcal disease in adults. *Clin Microbiol Infect* 2012;18 7-14.
27. Käypä hoito-työryhmä. Keuhkokuumeen hoito. *Duodecim* 2008;124:2030-9.

**FIGURE LEGENDS**

Figure 1. Inclusion of the patients. Patients were excluded from this study if they had severe pneumonia requiring treatment in the intensive care unit, if they could not give informed consent due to confusion, or if their antibiotic treatment had already been started on another institution.

Figure 2. Kaplan-Meier plot showing long-term survival after community-acquired pneumonia among patients with diabetes (N = 22, the bottom line), non-diabetic patients with new postprandial hyperglycaemia (N = 43, the middle line), and non-diabetic patients without postprandial hyperglycaemia (N = 88, the top line). P < 0.001 between the groups.

1  
2  
3 **The long-term mortality after community-acquired pneumonia: Impacts of diabetes and newly**  
4 **discovered hyperglycaemia. A prospective, observational cohort study.**  
5

6 Running title: Pneumonia and hyperglycaemia  
7

8 Heikki O Koskela, MD <sup>1</sup>, Päivi H Salonen, MD <sup>2</sup>, Jarkko Romppanen, MD <sup>3</sup>, Leo Niskanen, MD <sup>4</sup>  
9

10  
11  
12 <sup>1</sup> Unit for Medicine and Clinical Research, Pulmonary Division, Kuopio University Hospital, PB 1777, 70211  
13 Kuopio, Finland and School of Medicine, Institute of Clinical Sciences, Faculty of Health Sciences, University  
14 of Eastern Finland, PB 1627, 70211 Kuopio, Finland  
15

16 <sup>2</sup> Unit for Medicine and Clinical Research, Pulmonary Division, Kuopio University Hospital, PB 1777, 70211  
17 Kuopio, Finland  
18

19 <sup>3</sup> Eastern Finland Laboratory Centre, PB 1700, 70211 Kuopio, Finland  
20

21 <sup>4</sup> School of Medicine, Institute of Clinical Sciences, Faculty of Health Sciences, University of Eastern Finland,  
22 PB 1627, 70211 Kuopio, Finland and Finnish Medicines Agency Fimea, PB 55, 00034 FIMEA, Helsinki, Finland  
23

24  
25  
26 Corresponding author: Heikki O Koskela

27  
28 Unit for Medicine and Clinical Research, Pulmonary Division, Kuopio University Hospital, Kuopio, Finland

29  
30 Postal address: PL 1777, 70211 Kuopio, FINLAND

31  
32 e-mail: heikki.koskela@kuh.fi  
33

34  
35 Key words: Pneumonia, pneumonia mortality, diabetes, hyperglycaemia  
36  
37

38  
39 Word count:  
40  
41  
42  
43  
44  
45  
46  
47  
48  
49  
50  
51  
52  
53  
54  
55  
56  
57  
58  
59  
60

**ABSTRACT**

**Objectives** Community-acquired pneumonia is associated with a significant long-term mortality after initial recovery. It has been acknowledged that additional research is urgently needed to examine the contributors to this long-term mortality. The objective of the present study was to assess whether diabetes or newly discovered hyperglycaemia during pneumonia affects the long-term mortality.

**Design:** A prospective, observational cohort study

**Setting:** A single secondary centre in eastern Finland

**Participants:** 153 consecutive hospitalised patients who survived at least 30 days after mild to moderate community-acquired pneumonia.

**Interventions:** Plasma glucose levels were recorded seven times during the first day on the ward. Several possible confounders were also recorded. The surveillance status and causes of death were recorded after median of five years and eleven months.

**Results** In multivariate Cox regression analysis, a previous diagnosis of diabetes among the whole population (adjusted hazard ratio 2.84 (1.35 – 5.99)) and new postprandial hyperglycaemia among the non-diabetic population (adjusted hazard ratio 2.56 (1.04 – 6.32)) showed independent associations with late mortality. New fasting hyperglycaemia was not an independent predictor. The mortality rates at the end of follow-up were 54 %, 37 %, and 10 % among patients with diabetes, non-diabetic patients with new postprandial hyperglycaemia, and non-diabetic patients without postprandial hyperglycaemia, respectively ( $p < 0.001$ ). The underlying causes of death roughly mirrored those in Finnish general population with a slight excess in mortality due to chronic respiratory diseases. Pneumonia was the immediate cause of death in just 8 % of all late deaths.

**Conclusions** A previous diagnosis of diabetes and newly discovered postprandial hyperglycaemia increase the risk of death for several years after community-acquired pneumonia. As the knowledge about patient subgroups with an increased late mortality risk is gradually gathering, more studies are needed to evaluate the possible post-pneumonia interventions to reduce the late mortality.

**Strengths and limitations of the study**

- The plasma glucose levels were carefully measured during pneumonia with seven plasma glucose measurements during the first day on ward
- The prospective nature of the study provided comprehensive collection of information about possible confounders
- The main limitation is the lack of validated pneumonia severity scoring although several pneumonia severity-related variables were collected
- The present population consists of patients with mild to moderate CAP. Therefore, the results cannot be generalised to all hospitalised pneumonia patients.

For peer review only

## INTRODUCTION

Pneumonia is the leading cause of infectious death worldwide with 3.2 million annual casualties.[1] This figure, which is impressive enough *per se*, only contains the acute mortality. Pneumonia is also associated with significant late mortality up to several years afterwards among patients who survive the initial episode. In a large population-based cohort study, the mortality rate was 53 % at five years after an episode of community-acquired pneumonia (CAP).[2] Importantly, the long-term mortality is substantially higher than that of either the general population or a control population hospitalised for reasons other than CAP.[3-5] Given the high and rising incidence of CAP, its long-acting effect on mortality should be regarded as major public health threat.[6 7] It has been acknowledged that additional research is urgently needed to examine the contributors to this long-term mortality.[8]

Probably the most consistently identified contributor to late mortality after CAP is the presence of comorbid conditions, especially neurodegenerative disorders, cardiovascular conditions, malignancy, and chronic obstructive lung disease.[7] To the best of our knowledge, diabetes has not been investigated in this respect. Yende *et al.* analysed two large CAP cohorts and found out that diabetes increased the mortality rate within the first year after CAP with unadjusted hazard ratios (HR) of 1.4 - 1.9.[9] They suggested that the higher mortality may be due to worsening of pre-existing cardiovascular disease or higher risk of acute kidney injury. However, the early and late deaths were not analysed separately and the follow-up time was relatively short.

Hyperglycaemia is associated with short-term mortality in several acute disorders including CAP.[10-14] In pneumonia, a newly detected hyperglycaemia among non-diabetic patients seems to increase the short-term mortality rate more than hyperglycaemia among diabetic patients.[13] The impact of new, pneumonia-associated hyperglycaemia on the long-term mortality has not been investigated. The objective of the present study was to assess whether diabetes or newly discovered hyperglycaemia among non-diabetics affects the late mortality after CAP.

## METHODS

### Study design and the population

1  
2  
3 This prospective, observational cohort study was carried out at Kuopio University Hospital in Finland. From  
4 November 2006 to May 2008 all adult patients admitted to the pulmonology ward due to CAP were  
5 recruited. The patients were considered to have pneumonia if they had an acute febrile illness with a new  
6 radiographic shadowing. During that time 245 patients were hospitalised because of pneumonia (figure 1).  
7 Patients were excluded from this study if they had severe pneumonia requiring treatment in the intensive  
8 care unit, if they could not give informed consent due to confusion, or if their antibiotic treatment had  
9 already been started on another institution. Altogether 92 patients were excluded and 153 patients  
10 included. All the 153 patients survived at least 30 days after admission. Among them, 22 had a previous  
11 diagnosis of diabetes (table 1).  
12  
13  
14  
15  
16  
17  
18  
19  
20

### 21 **Measurements during pneumonia**

22  
23  
24  
25 During the first 24 hours on the ward the plasma glucose was determined seven times, at three o'clock at  
26 night, before breakfast, before lunch, after lunch, before dinner, after dinner, and at bedtime. In addition,  
27 the family history for diabetes and the pre-pneumonia Karnofsky performance score were assessed.  
28  
29 **Karnofsky score is a general measure of patient independence which has most often utilised in patients**  
30 **with cancer.[15 16]** Height, weight, waist circumference, oxygen saturation, blood pressure, temperature,  
31 and heart rate were measured. Blood tests included glycosylated haemoglobin A1c (HbA1c), N-terminal pro  
32 B-type natriuretic peptide (NT-proBNP), C-reactive protein, leukocytes, urea, and arterial blood gas analysis.  
33  
34  
35  
36  
37  
38  
39

40 The detailed description of the methods and the baseline results have been published.[17] However, the  
41 NT-proBNP analysis will be described here for the first time. It was added to the present study since it has  
42 been shown to associate with pneumonia prognosis.[18] It was measured from the blood sample collected  
43 at admission utilising a commercially available electrochemiluminescence immunoassay (Roche Diagnostics  
44 GmbH, Mannheim, Germany). Elevated NT-proBNP was defined as plasma concentration above 450 ng/l  
45 for patients younger than 50 years, above 900 ng/l for patients aged 50 – 75 years and above 1800 ng/ml  
46 for patients older than 75 years.[19]  
47  
48  
49  
50  
51  
52  
53  
54  
55  
56  
57  
58  
59  
60



Table 1. Patient characteristics

|                                | Diabetic patients (N = 22) | p <sup>a</sup> | Patients without diabetes (N = 131)  |                                         | p <sup>b</sup> | Patients with missing data |
|--------------------------------|----------------------------|----------------|--------------------------------------|-----------------------------------------|----------------|----------------------------|
|                                |                            |                | Postprandial hyperglycaemia (n = 43) | No postprandial hyperglycaemia (n = 88) |                |                            |
| Age, yrs                       | 66 (59 - 73)               | 0.04           | 66 (60 - 71)                         | 53 (49 - 58)                            | 0.001          | 0                          |
| Male gender                    | 68 %                       | 0.40           | 67 %                                 | 54 %                                    | 0.16           | 0                          |
| Family history of diabetes     | 68 %                       | 0.004          | 47 %                                 | 30 %                                    | 0.07           | 14                         |
| BMI, kg/m <sup>2</sup>         | 33 (28 - 37)               | 0.001          | 27 (25 - 29)                         | 27 (26 - 29)                            | 0.56           | 0                          |
| Waist circumference, cm        | 110 (102 - 118)            | <0.001         | 100 (95 - 104)                       | 97 (94 - 100)                           | 0.27           | 18                         |
| gHbA1c, %                      | 7.83 (6.97 - 8.69)         | <0.001         | 6.12 (5.79 - 6.44)                   | 5.64 (5.53 - 5.76)                      | <0.001         | 7                          |
| Karnofsky 80% or less          | 50 %                       | 0.02           | 44 %                                 | 16 %                                    | <0.001         | 0                          |
| Three or more comorbidities    | 54 %                       | <0.001         | 23 %                                 | 14 %                                    | 0.17           | 0                          |
| Diastolic blood pressure, mmHg | 75 (69 - 81)               | 0.12           | 81 (75 - 86)                         | 80 (77 - 84)                            | 0.99           | 1                          |
| Heart rate, 1/min              | 99 (90 - 109)              | 0.22           | 100 (92 - 107)                       | 91 (86 - 95)                            | 0.005          | 1                          |
| Oxygen saturation (%)          | 92 (89 - 94)               | 0.35           | 91 (89 - 93)                         | 94 (93 - 95)                            | 0.004          | 13                         |
| Leukocytes, 10 <sup>9</sup> /l | 11.8 (9.6 - 13.9)          | 0.46           | 12.4 (10.6 - 14.3)                   | 11.7 (10.1 - 13.3)                      | 0.10           | 0                          |
| Urea, mmol/l                   | 6.88 (4.96 - 8.79)         | 0.28           | 8.61 (6.41 - 10.8)                   | 4.72 (4.00 - 5.44)                      | <0.001         | 11                         |
| CRP, mg/l                      | 164 (119 - 209)            | 0.97           | 228 (166 - 289)                      | 146 (127 - 165)                         | <0.001         | 1                          |
| Elevated NT-proBNP             | 32 %                       | 0.51           | 29 %                                 | 23 %                                    | 0.47           | 4                          |
| Length of hospital stay, days  | 5.8 (4.6 - 7.1)            | 0.53           | 6.6 (5.7 - 7.5)                      | 5.9 (5.2 - 6.6)                         | 0.03           | 1                          |

BMI, body mass index; gHbA1c, glycosylated haemoglobin A1c expressed as percentage of total haemoglobin; CRP, C-reactive protein; NT-proBNP, plasma N-terminal pro B-type natriuretic peptide. The data is presented either as percentage of patients showing the feature or means (95 % confidence intervals)

<sup>a</sup> p value indicates the differences between diabetic and non-diabetic patients

<sup>b</sup> p value indicates the differences between the patients with and without postprandial hyperglycaemia within the non-diabetic patients.

## Definitions

Diabetes was defined as doctor's diagnosis of diabetes which had been set before the current pneumonia episode, and verified from the patient files. New hyperglycaemia was defined as hyperglycaemia during the first 24 hours of pneumonia hospitalisation in a patient without a doctor's diagnosis of diabetes. Fasting hyperglycaemia was defined as hyperglycaemia detected at three o'clock at night or at seven o'clock in the morning before breakfast. Postprandial hyperglycaemia was defined as hyperglycaemia detected during the daytime or in the evening. **The cut-off values for both fasting and postprandial hyperglycaemia among the non-diabetic patients were those defined by the receiver operator curves (ROC) analysis (see below).** The main outcome variable was mortality from 30 days after pneumonia up to the end of follow-up. The predictor variables were diabetes, new fasting hyperglycaemia, and new postprandial hyperglycaemia. A confounder was a variable which showed an association with both the plasma glucose levels during pneumonia and the late mortality. However, a potential confounder with a causal relationship to the outcome variable was not included. Furthermore, if two potential confounders were closely interrelated, the one with a closer association with the plasma glucose levels was included.

## Follow-up after pneumonia

In September 2013 the survival status was obtained in all patients from the National Statistical Service of Finland. The immediate and underlying causes of death, according to the International Classification of Diseases version 10, were obtained from death certificates. The median follow-up was five years and eleven months.

## Ethics

The study was reviewed by the Research Ethic Committee, Hospital District of Northern Savo (75//2006 ) and it was performed in accordance with the ethical standards laid down on the 2000 Declaration of Helsinki. All patients gave their written informed consent.

## Statistical analysis

Comparative survival curves were constructed using Kaplan-Meier methodology. The unadjusted HRs were assessed utilising univariate Cox regression analysis. Continuous data was divided to quartiles. The assumption of proportional hazard was checked by graphically comparing the hazard curves. To determinate the adjusted HRs for diabetes, new fasting hyperglycaemia and new postprandial hyperglycaemia, Cox multivariate regression analysis with backwards directed stepwise procedure was utilised. In this analysis patients with missing data were excluded.

The analysis about the effect of new hyperglycaemia was restricted to the 131 non-diabetic pneumonia patients. Among them, ROC curves were produced for both fasting and postprandial plasma glucose values to define the best cut-off values to predict death during the follow-up.

Frequency comparison was performed by Chi-squared test. Student's T-test and Pearson correlation coefficient were utilised when appropriate. Categorical data is expressed as percentages and continuous data as means and 95 % confidence intervals (CI). Statistical significance was defined as a p-value of < 0.05. Analyses were performed using SPSS V.19.0 for the personal computer (SPSS, Inc. Chicago, Illinois, USA).

## RESULTS

### Univariate analysis and the ROC analysis

Table 1 shows the numbers of patients in each subgroup and their characteristics. The following features showed a statistically significant association with the late mortality within the whole population: Presence of diabetes (HR 3.5 (1.7 - 6.9), figure 2), advanced age, Karnofsky score equal or less than 80 %, presence of three or more co-morbidities, low diastolic blood pressure, low arterial blood oxygen saturation, high urea,

1  
2  
3 NT-proBNP above predicted value[19], high gHbA1c, and long hospital stay (data not shown). The  
4 proportional hazards remained constant over time.  
5

6  
7 Among the non-diabetic patients, the ROC analysis of the fasting plasma glucose measurements revealed  
8 that the level of 7.05 mmol/l was the best cut-off value to predict late mortality (results not shown). A  
9 glucose level exceeding it showed an unadjusted HR of 2.7 (1.1 – 6.4) ( $p = 0.027$ ). 52 % of the non-diabetic  
10 patients showed a fasting glucose level exceeding 7.05 mmol/l. In one patient, no fasting glucose values  
11 were obtained. The ROC analysis of the postprandial glucose measurements revealed that the level of  
12 10.75 mmol/l was the best cut-off value (results not shown). The corresponding unadjusted HR was 4.2 (1.9  
13 – 9.6) ( $p = 0.001$ , figure 2). 33 % of the non-diabetic patients showed a postprandial glucose level exceeding  
14 10.75 mmol/l. Utilising these plasma glucose cut-off values among the 22 diabetic patients it could be  
15 shown that 19 of them (86 %) showed fasting hyperglycaemia and 18 (82 %) showed postprandial  
16 hyperglycaemia.  
17  
18  
19  
20  
21  
22  
23  
24  
25

### 26 **Multivariate analysis**

27  
28  
29  
30  
31 The following confounders were included: Age, Karnofsky score equal or less than 80%, elevated plasma  
32 NT-proBNP, and plasma urea concentration. The results of the multivariate Cox regression analysis are  
33 shown in tables 2 and 3. It can be seen that a diagnosis of diabetes among the whole population (table 2)  
34 and new postprandial hyperglycaemia among the non-diabetic population (table 3) showed independent  
35 associations with late mortality after pneumonia. New fasting hyperglycaemia was not a predictor of  
36 mortality when the confounders were taken into account ( $p = 0.74$ ).  
37  
38  
39  
40  
41  
42  
43

### 44 **The mortality rates and the causes of death**

45  
46  
47  
48  
49 The mortality rates at the end of follow-up were 54 %, 37 %, and 10 % among patients with diabetes, non-  
50 diabetic patients with new postprandial hyperglycaemia, and non-diabetic patients without postprandial  
51 hyperglycaemia, respectively ( $p < 0.001$ ). The underlying causes of death are shown in table 4. The  
52 immediate causes of death mirrored the underlying causes. Pneumonia was the immediate cause of death  
53 in just three cases (8 % of all deaths).  
54  
55  
56  
57  
58  
59  
60

Table 2. Cox multivariate regression analysis with backward directed stepwise procedure about the effect of diabetes on the risk of late death after pneumonia. The included confounders were age, Karnofsky score equal or less than 80%, elevated plasma NT-proBNP, and plasma urea concentration. Only factors with at least suggestive independent association ( $p < 0.10$ ) with the risk of late death are presented.  $N = 142$  (one diabetic and ten non-diabetic patients were excluded due to lack of urea measurements).

|                                  | <b>Adjusted hazard ratio</b> | <b>95 % CI</b> | <b>P value</b> |
|----------------------------------|------------------------------|----------------|----------------|
| Diabetes                         | 2.84                         | 1.35 – 5.99    | 0.006          |
| Karnofsky equal or less than 80% | 4.19                         | 1.86 – 9.46    | 0.001          |
| Age, years                       | 1.53*                        | 1.00 – 2.34    | 0.048          |
| Urea, mmol/L                     | 1.78*                        | 1.20 - 2.64    | 0.004          |

\*Hazard ratio is expressed per quartile

Table 3. Cox multivariate regression analysis with backward directed stepwise procedure about the effect of new postprandial hyperglycaemia on the risk of late death after pneumonia. The included confounders were age, Karnofsky score equal or less than 80%, elevated plasma NT-proBNP, and plasma urea concentration. Only factors with at least suggestive independent association ( $p < 0.10$ ) with the risk of late death are presented.  $N = 131$ , only the non-diabetic patients were included.

|                                  | <b>Adjusted hazard ratio</b> | <b>95 % CI</b> | <b>P value</b> |
|----------------------------------|------------------------------|----------------|----------------|
| New postprandial hyperglycaemia  | 2.56                         | 1.04 – 6.32    | 0.041          |
| Karnofsky equal or less than 80% | 3.26                         | 1.12 – 9.47    | 0.030          |
| Age, years                       | 1.97*                        | 1.14 – 3.39    | 0.015          |

\*Hazard ratio is expressed per quartile

Table 4. The underlying causes of late death

| Group                                                     | Cancer   | Cardiovascular | Obstructive lung diseases | Miscellaneous |
|-----------------------------------------------------------|----------|----------------|---------------------------|---------------|
| No diabetes, no postprandial hyperglycaemia (9 deaths)    | 2 (22 %) | 4 (44 %)       | 0 (0 %)                   | 3 (33 %)      |
| No diabetes, with postprandial hyperglycaemia (16 deaths) | 1 (6 %)  | 4 (25 %)       | 7 (44 %)                  | 4 (25 %)      |
| Diabetes (11 deaths)                                      | 3 (27 %) | 6 (54 %)       | 0 (0 %)                   | 2 (18 %)      |
| All patients (36 deaths)                                  | 6 (17 %) | 14 (39 %)      | 7 (19 %)                  | 9 (25 %)      |

## DISCUSSION

The present study confirms that both the pre-pneumonia health status and the severity of pneumonia are associated with the late mortality after CAP.[7] Especially, the weight of low functional status was highlighted by the strong association between low Karnofsky score and late mortality. These features were taken into account in the present study. It showed that a pre-pneumonia diagnosis of diabetes is associated with a three-fold increase in the risk of death up to six years after mild to moderate CAP. The study thus corroborates and extends the findings of Yende et al, who reported of increased mortality rates in diabetic patients up to one year after pneumonia.[9] The present study also demonstrated that new postprandial hyperglycaemia among non-diabetic patients shows an independent association with late mortality after pneumonia. Such an association has not been described earlier.

1  
2  
3 In acute illnesses, complex mechanisms involving hormones and cytokines lead to hyperglycaemia which is  
4 mainly caused by excessive hepatic glucose production and manifested by high fasting glucose values.[12]  
5  
6 This probably explains our finding that fasting hyperglycaemia was more common than postprandial  
7 hyperglycaemia among the non-diabetic CAP patients. As fasting hyperglycaemia was not an independent  
8 predictor of mortality in the present study, it may be regarded as an adequate body response to infection.  
9  
10 Postprandial hyperglycaemia, in turn, is considered as the first step in the deterioration of glucose  
11 homeostasis.[20] In the present study, the survival curves of the diabetic patients and the non-diabetic  
12 patients with postprandial hyperglycaemia were almost identical up to 2.5 years. There is evidence  
13 suggesting that postprandial hyperglycaemia is an independent risk factor for cardiovascular disease,  
14 stroke, retinopathy, renal failure, and neurologic complications in both diabetic and non-diabetic  
15 individuals.[20] Excess late mortality after CAP can now be added to that list.  
16  
17  
18  
19  
20  
21  
22  
23

24 One may suspect that the hyperglycaemic patients without a previous, doctor's diagnosis of diabetes may  
25 actually have suffered from diabetes without knowing it. HbA1c reflects mean blood glucose levels during  
26 the previous 2 – 3 months and can be used to diagnose diabetes.[21] It is true that the HbA1c values were  
27 higher in the non-diabetic patients with new postprandial hyperglycaemia than in those without it.  
28  
29 However, the 95 % confidence interval of their HbA1c values was below 6.5 % which is considered  
30 diagnostic for diabetes[21] and also well below the HbA1c values of the diabetic patients. In addition, the  
31 patients with new postprandial hyperglycaemia did not differ from the euglycaemic non-diabetic patients  
32 with respect to family history of diabetes, body mass index, or waist circumference. On the contrary, the  
33 patients with a doctor's diagnosis of diabetes clearly differed from the rest of the population by showing all  
34 these typical features of type 2 diabetes.[22] Therefore, most of the CAP patients with new postprandial  
35 hyperglycaemia probably did not have an undiagnosed diabetes before pneumonia. This supports the view  
36 that stress hyperglycaemia and diabetes are two separate disorders.[12 17 23]  
37  
38  
39  
40  
41  
42  
43  
44  
45  
46

47 The commonly used plasma glucose cut-off values for transient hyperglycaemia during illness (stress  
48 hyperglycaemia) have been adopted from the diabetes diagnostics (fasting glucose > 6.9 mmol/l or random  
49 glucose > 11.1 mmol/l).[12] To our knowledge, they have not been validated in stress hyperglycaemia. As  
50 mentioned, diabetes and stress hyperglycaemia are two separate disorders. The present material gave an  
51 opportunity to define plasma glucose cut-off values that best predicted late mortality among the non-  
52 diabetic patients: 7.05 mmol/l for fasting glucose and 10.75 mmol/l for postprandial glucose. Our values  
53 were surprisingly close to those adopted from diabetes diagnostics and thus support their use also among  
54  
55  
56  
57  
58  
59  
60

1  
2  
3 non-diabetic patients with stress hyperglycaemia. Utilising the cut-off values from the diabetes diagnostics  
4 would not have changed the results of the present study.  
5  
6  
7  
8

9  
10 The present paper provides some new information how to identify patients at increased risk of death late  
11 after CAP. However, it is not known whether the identification of such patients can influence their long-  
12 term prognosis. Streptococcus pneumonia vaccination after CAP may be of limited value since just 8 % of all  
13 late deaths were caused by pneumonia in the present study. This is in accordance with a larger study in  
14 which just 6 % of short-term survivors from CAP finally died of pneumonia.[5] The underlying causes of  
15 death in the present population roughly mirrored those in Finnish general population [24] with one  
16 exception: In the general population, the proportion of a chronic lung disease as the underlying cause of  
17 death is 4 % but in the present population it was 19 %. The above-mentioned Dutch study reported exactly  
18 the same finding with much higher numbers of deaths.[5] This may be, at least partly, due to patients with  
19 obstructive lung diseases being prone to catch CAP and prone to be hospitalised in case of CAP.[25]  
20  
21  
22  
23  
24  
25  
26  
27  
28

29 If the possibilities for secondary interventions are to be established, the focus should perhaps be in the  
30 primary prevention of pneumonia. The present study suggests that pneumococcus vaccination should be  
31 focused on diabetic patients, aged patients, and those with low performance status, among other groups  
32 previously reported to show an excessive long-term mortality after pneumonia.[7 26]  
33  
34  
35  
36  
37  
38

39 The main strength of the present study was the careful way to detect hyperglycaemia during pneumonia  
40 with seven plasma glucose measurements during the first day on ward, also including night-time  
41 measurements. Most previous studies about the effects of hyperglycaemia on pneumonia prognosis are  
42 handicapped by the small number, usually one, of plasma glucose measurements. Plasma glucose levels  
43 vary markedly within a day during an acute illness and a single measurement can easily miss the highest  
44 values.[17 23] Frequent glucose measurements explain the higher prevalence of new hyperglycaemia in the  
45 present study compared with the previous ones.[10 11] The prospective nature and the comprehensive  
46 collection of information about possible confounders may also be considered as strengths.  
47  
48  
49  
50  
51  
52  
53  
54

55 The main limitation of the present study was the lack of validated pneumonia severity scoring. The  
56 management of the present patients was based on local guidelines. The Finnish pneumonia guideline  
57 suggested the use of a validated severity score not until autumn 2008 [27], i.e., after the present patient  
58  
59  
60



1  
2  
3 population had been collected. The lack of systematic recording of respiratory rate precludes the  
4 calculation of any validated severity scores afterwards. However, many severity-related variables like  
5 oxygen saturation, temperature, blood pressure, heart rate, C-reactive protein, leukocytes, urea, and  
6 arterial blood gas analysis, were recorded. The population did not include patients who were confused and  
7 patients who needed treatment in intensive care unit. The present population thus consists of patients with  
8 mild to moderate CAP. Therefore, the results cannot be generalised to all hospitalised pneumonia patients.  
9  
10  
11  
12  
13 The relatively small number of patients and deaths may also decrease the generalisability of the results.  
14

15  
16  
17 In conclusion, a previous diagnosis of diabetes and newly discovered postprandial hyperglycaemia may  
18 increase the risk of death for several years after CAP. As the knowledge about patient subgroups with an  
19 increased late mortality risk is gradually gathering, more studies are needed to evaluate the possible post-  
20 pneumonia interventions to reduce the late mortality.  
21  
22  
23  
24  
25  
26  
27  
28  
29  
30  
31  
32  
33  
34  
35  
36  
37  
38  
39  
40  
41  
42  
43  
44  
45  
46  
47  
48  
49  
50  
51  
52  
53  
54  
55  
56  
57  
58  
59  
60

**Funding**

The study was mainly funded by the Hospital District of Northern Savo. In addition, Päivi Salonen has received funding from Finnish Anti-Tuberculosis Association Foundation and Pulmonary Foundation in Kuopio Area. The funding sources have no involvement in study design; in collection, analysis, or interpretation of data; in the writing of the report; or in the decision to submit the manuscript for publication.

**Competing interests**

The authors have no competing interests

**Ethics approval**

The study was reviewed by the Research Ethic Committee, Hospital District of Northern Savo (75//2006 ) and it was performed in accordance with the ethical standards laid down on the 2000 Declaration of Helsinki. All patients gave their written informed consent.

**Contributions**

Heikki Koskela has made substantial contributions to conception and design, acquisition of data, and analysis and interpretation of data; He has written the article and is the guarantor.

Päivi Salonen has made substantial contributions to conception and design, acquisition of data, and analysis and interpretation of data. She has revised the article critically for important intellectual content and provided final approval of the version to be published.

Jarkko Romppanen has made substantial contributions to conception and design, acquisition of data, and analysis and interpretation of data. He has revised the article critically for important intellectual content and provided final approval of the version to be published.

Leo Niskanen has made substantial contributions to conception and design, acquisition of data, and analysis and interpretation of data. He has revised the article critically for important intellectual content and provided final approval of the version to be published.

**Data sharing statement**

Extra data is available by emailing Heikki Koskela

### Acknowledgements

We thank all the nurses on the respiratory medicine ward of Unit of Medicine and Clinical Research, Kuopio University Hospital, for measuring the plasma glucose values.

For peer review only

## REFERENCES

1. World Health Organization. The top 10 causes of death 2011. Secondary The top 10 causes of death 2011 2013. <http://who.int/mediacentre/factsheets/fs310/en/>. Access date 16.05.2014
2. Johnstone J, Eurich DT, Majumdar SR, Jin Y, Marrie TJ. Long-term morbidity and mortality after hospitalization with community-acquired pneumonia: a population-based cohort study. *Medicine (Baltimore)* 2008;87:329-34.
3. Koivula I, Sten M, Makela PH. Prognosis after community-acquired pneumonia in the elderly: a population-based 12-year follow-up study. *Arch Intern Med* 1999;159:1550-5.
4. Kaplan V, Clermont G, Griffin MF, et al. Pneumonia: still the old man's friend? *Arch Intern Med* 2003;163:317-23.
5. Bruns AH, Oosterheert JJ, Cucciolillo MC, et al. Cause-specific long-term mortality rates in patients recovered from community-acquired pneumonia as compared with the general Dutch population. *Clin Microbiol Infect* 2011;17:763-8.
6. Ewig S, Torres A. Community-acquired pneumonia as an emergency: time for an aggressive intervention to lower mortality. *Eur Respir J* 2011;38:253-60.
7. Restrepo MI, Faverio P, Anzueto A. Long-term prognosis in community-acquired pneumonia. *Curr Opin Infect Dis* 2013;26:151-8.
8. Mortensen EM. Potential causes of increased long-term mortality after pneumonia. *Eur Respir J* 2011;37:1306-7.
9. Yende S, van der Poll T, Lee M, et al. The influence of pre-existing diabetes mellitus on the host immune response and outcome of pneumonia: analysis of two multicentre cohort studies. *Thorax* 2010;65:870-7.
10. Kinzel T, Smith M. Hyperglycemia as a predictor for mortality in veterans with pneumonia. *Exp Aging Res* 1988;14:99-102.
11. McAlister FA, Majumdar SR, Blitz S, Rowe BH, Romney J, Marrie TJ. The relation between hyperglycemia and outcomes in 2,471 patients admitted to the hospital with community-acquired pneumonia. *Diabetes Care* 2005;28:810-5.
12. Dungan KM, Braithwaite SS, Preiser JC. Stress hyperglycaemia. *Lancet* 2009;373:1798-807.
13. Rueda AM, Ormond M, Gore M, Matloobi M, Giordano TP, Musher DM. Hyperglycemia in diabetics and non-diabetics: effect on the risk for and severity of pneumococcal pneumonia. *J Infect* 2010;60:99-105.
14. Lepper PM, Ott S, Nuesch E, et al. Serum glucose levels for predicting death in patients admitted to hospital for community acquired pneumonia: prospective cohort study. *BMJ* 2012;344:e3397.

15. Karnofsky DA, Burchenal JH. The clinical evaluation of chemotherapeutic agents in cancer. In: Macleod CM, ed. Evaluation of chemotherapeutic agents. New York: Columbia University Press, 1949:191-205.
16. Yates JW, Chalmer B, McKegney FP. Evaluation of patients with advanced cancer using the Karnofsky performance status. *Cancer* 1980;45:2220-4.
17. Salonen PH, Koskela HO, Niskanen L. Prevalence and determinants of hyperglycaemia in pneumonia patients. *Scand J Infect Dis* 2013;45:88-94.
18. Kruger S, Papassotiriou J, Marre R, et al. Pro-atrial natriuretic peptide and pro-vasopressin to predict severity and prognosis in community-acquired pneumonia : Results from the German competence network CAPNETZ. *Intensive Care Med* 2007;33:2069-78.
19. Januzzi JL, van Kimmenade R, Lainchbury J, et al. NT-proBNP testing for diagnosis and short-term prognosis in acute destabilized heart failure: an international pooled analysis of 1256 patients: the International Collaborative of NT-proBNP Study. *Eur Heart J* 2006;27:330-7.
20. Gerich J. Pathogenesis and management of postprandial hyperglycemia: role of incretin-based therapies. *Int J Gen Med* 2013;6:877-95.
21. Standards of medical care in diabetes--2013. *Diabetes Care* 2013;36 S11-66.
22. Noble D, Mathur R, Dent T, Meads C, Greenhalgh T. Risk models and scores for type 2 diabetes: systematic review. *BMJ* 2011;343:d7163.
23. Koskela HO, Salonen PH, Niskanen L. Hyperglycaemia during exacerbations of asthma and chronic obstructive pulmonary disease. *Clin Respir J* 2013;7:382-9.
24. National Statistical Service of Finland. The causes of death 2012. [https://tilastokeskus.fi/til/ksyyt/2012/ksyyt\\_2012\\_2013-12-30\\_tie\\_001\\_fi.html](https://tilastokeskus.fi/til/ksyyt/2012/ksyyt_2012_2013-12-30_tie_001_fi.html). Access date 16.05.2014
25. Farr BM, Sloman AJ, Fisch MJ. Predicting death in patients hospitalized for community-acquired pneumonia. *Ann Intern Med* 1991;115:428-36.
26. Blasi F, Mantero M, Santus P, Tarsia P. Understanding the burden of pneumococcal disease in adults. *Clin Microbiol Infect* 2012;18 7-14.
27. Käypä hoito-työryhmä. Keuhkokuumeen hoito. *Duodecim* 2008;124:2030-9.

**FIGURE LEGENDS**

Figure 1. Inclusion of the patients. Patients were excluded from this study if they had severe pneumonia requiring treatment in the intensive care unit, if they could not give informed consent due to confusion, or if their antibiotic treatment had already been started on another institution.

Figure 2. Kaplan-Meier plot showing long-term survival after community-acquired pneumonia among patients with diabetes (N = 22, **the bottom line**), non-diabetic patients with new postprandial hyperglycaemia (N = 43, **the middle line**), and non-diabetic patients without postprandial hyperglycaemia (N = 88, **the top line**). P < 0.001 between the groups.

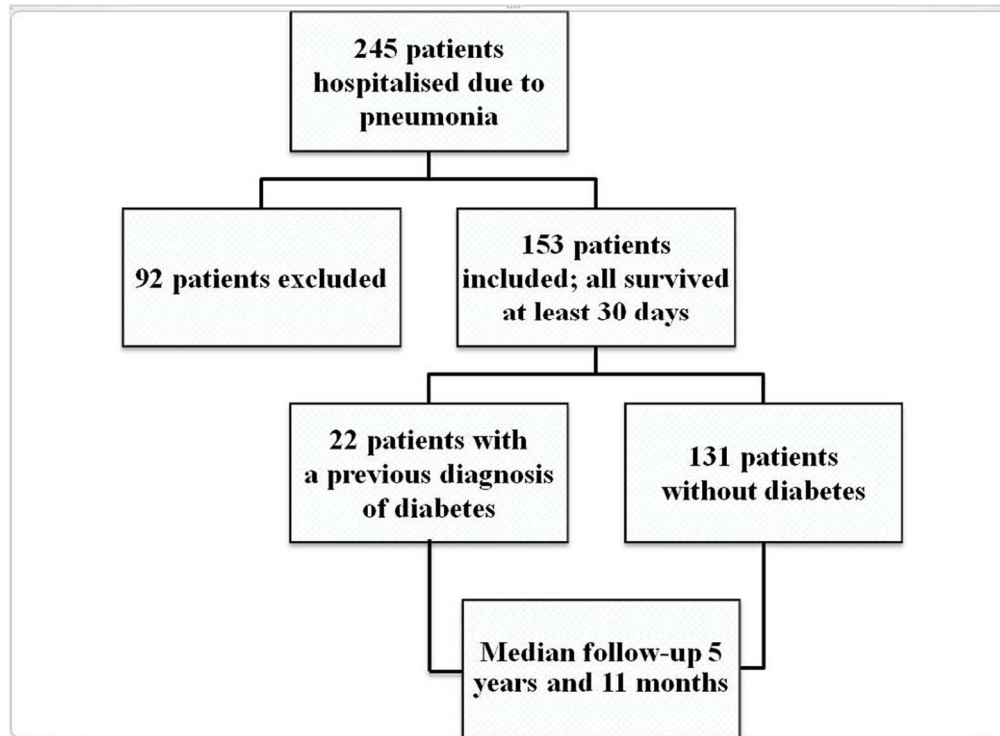

Figure 1  
90x66mm (300 x 300 DPI)

1  
2  
3  
4  
5  
6  
7  
8  
9  
10  
11  
12  
13  
14  
15  
16  
17  
18  
19  
20  
21  
22  
23  
24  
25  
26  
27  
28  
29  
30  
31  
32  
33  
34  
35  
36  
37  
38  
39  
40  
41  
42  
43  
44  
45  
46  
47  
48  
49  
50  
51  
52  
53  
54  
55  
56  
57  
58  
59  
60

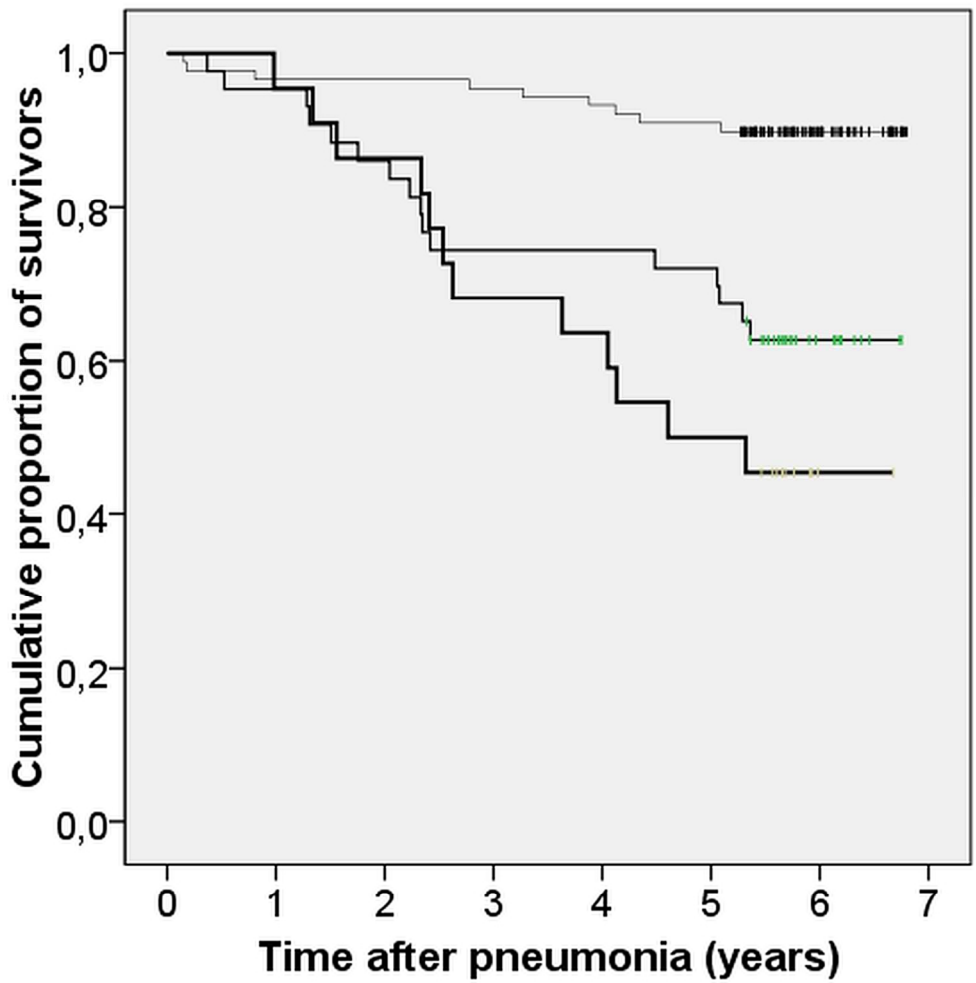

90x89mm (300 x 300 DPI)

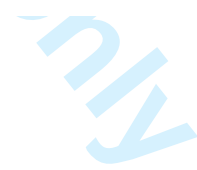



## STROBE Statement—checklist of items that should be included in reports of observational studies

|                              | Item No | Recommendation                                                                                                                                                                                                                                                                                                                                                                                                                                                                                                                                                                                                                                                                                          |
|------------------------------|---------|---------------------------------------------------------------------------------------------------------------------------------------------------------------------------------------------------------------------------------------------------------------------------------------------------------------------------------------------------------------------------------------------------------------------------------------------------------------------------------------------------------------------------------------------------------------------------------------------------------------------------------------------------------------------------------------------------------|
| <b>Title and abstract</b>    | 1       | (a) Indicate the study's design with a commonly used term in the title or the abstract PAGES 1, 2<br>(b) Provide in the abstract an informative and balanced summary of what was done and what was found PAGE 2                                                                                                                                                                                                                                                                                                                                                                                                                                                                                         |
| <b>Introduction</b>          |         |                                                                                                                                                                                                                                                                                                                                                                                                                                                                                                                                                                                                                                                                                                         |
| Background/rationale         | 2       | Explain the scientific background and rationale for the investigation being reported PAGE 4                                                                                                                                                                                                                                                                                                                                                                                                                                                                                                                                                                                                             |
| Objectives                   | 3       | State specific objectives, including any prespecified hypotheses PAGE 4                                                                                                                                                                                                                                                                                                                                                                                                                                                                                                                                                                                                                                 |
| <b>Methods</b>               |         |                                                                                                                                                                                                                                                                                                                                                                                                                                                                                                                                                                                                                                                                                                         |
| Study design                 | 4       | Present key elements of study design early in the paper PAGE 5                                                                                                                                                                                                                                                                                                                                                                                                                                                                                                                                                                                                                                          |
| Setting                      | 5       | Describe the setting, locations, and relevant dates, including periods of recruitment, exposure, follow-up, and data collection PAGE 5                                                                                                                                                                                                                                                                                                                                                                                                                                                                                                                                                                  |
| Participants                 | 6       | (a) <i>Cohort study</i> —Give the eligibility criteria, and the sources and methods of selection of participants. Describe methods of follow-up PAGE 5<br><i>Case-control study</i> —Give the eligibility criteria, and the sources and methods of case ascertainment and control selection. Give the rationale for the choice of cases and controls<br><i>Cross-sectional study</i> —Give the eligibility criteria, and the sources and methods of selection of participants<br>(b) <i>Cohort study</i> —For matched studies, give matching criteria and number of exposed and unexposed<br><i>Case-control study</i> —For matched studies, give matching criteria and the number of controls per case |
| Variables                    | 7       | Clearly define all outcomes, exposures, predictors, potential confounders, and effect modifiers. Give diagnostic criteria, if applicable PAGE 7                                                                                                                                                                                                                                                                                                                                                                                                                                                                                                                                                         |
| Data sources/<br>measurement | 8*      | For each variable of interest, give sources of data and details of methods of assessment (measurement). Describe comparability of assessment methods if there is more than one group PAGE 5                                                                                                                                                                                                                                                                                                                                                                                                                                                                                                             |
| Bias                         | 9       | Describe any efforts to address potential sources of bias PAGES 13,14                                                                                                                                                                                                                                                                                                                                                                                                                                                                                                                                                                                                                                   |
| Study size                   | 10      | Explain how the study size was arrived at PAGE 5                                                                                                                                                                                                                                                                                                                                                                                                                                                                                                                                                                                                                                                        |
| Quantitative variables       | 11      | Explain how quantitative variables were handled in the analyses. If applicable, describe which groupings were chosen and why PAGES 7, 8                                                                                                                                                                                                                                                                                                                                                                                                                                                                                                                                                                 |
| Statistical methods          | 12      | (a) Describe all statistical methods, including those used to control for confounding PAGES 7,8<br>(b) Describe any methods used to examine subgroups and interactions PAGES 7,9<br>(c) Explain how missing data were addressed PAGE 8<br>(d) <i>Cohort study</i> —If applicable, explain how loss to follow-up was addressed NO LOSS TO FOLLOW-UP<br><i>Case-control study</i> —If applicable, explain how matching of cases and controls was addressed<br><i>Cross-sectional study</i> —If applicable, describe analytical methods taking account of sampling strategy<br>(e) Describe any sensitivity analyses PAGE 8                                                                                |

Continued on next page

**Results**

|                  |     |                                                                                                                                                                                                                                                                                                                                                                                                                                                    |
|------------------|-----|----------------------------------------------------------------------------------------------------------------------------------------------------------------------------------------------------------------------------------------------------------------------------------------------------------------------------------------------------------------------------------------------------------------------------------------------------|
| Participants     | 13* | (a) Report numbers of individuals at each stage of study—eg numbers potentially eligible, examined for eligibility, confirmed eligible, included in the study, completing follow-up, and analysed PAGE 5<br>(b) Give reasons for non-participation at each stage PAGE 5<br>(c) Consider use of a flow diagram FIGURE 1                                                                                                                             |
| Descriptive data | 14* | (a) Give characteristics of study participants (eg demographic, clinical, social) and information on exposures and potential confounders TABLE 1<br>(b) Indicate number of participants with missing data for each variable of interest TABLE 1<br>(c) <i>Cohort study</i> —Summarise follow-up time (eg, average and total amount) PAGE 7                                                                                                         |
| Outcome data     | 15* | <i>Cohort study</i> —Report numbers of outcome events or summary measures over time PAGE 7<br><i>Case-control study</i> —Report numbers in each exposure category, or summary measures of exposure<br><i>Cross-sectional study</i> —Report numbers of outcome events or summary measures                                                                                                                                                           |
| Main results     | 16  | (a) Give unadjusted estimates and, if applicable, confounder-adjusted estimates and their precision (eg, 95% confidence interval). Make clear which confounders were adjusted for and why they were included PAGES 8,9, TABLES 2, 3<br>(b) Report category boundaries when continuous variables were categorized PAGE 8<br>(c) If relevant, consider translating estimates of relative risk into absolute risk for a meaningful time period PAGE 9 |
| Other analyses   | 17  | Report other analyses done—eg analyses of subgroups and interactions, and sensitivity analyses PAGE 10                                                                                                                                                                                                                                                                                                                                             |

**Discussion**

|                  |    |                                                                                                                                                                                    |
|------------------|----|------------------------------------------------------------------------------------------------------------------------------------------------------------------------------------|
| Key results      | 18 | Summarise key results with reference to study objectives PAGE 11                                                                                                                   |
| Limitations      | 19 | Discuss limitations of the study, taking into account sources of potential bias or imprecision. Discuss both direction and magnitude of any potential bias PAGES 13,14             |
| Interpretation   | 20 | Give a cautious overall interpretation of results considering objectives, limitations, multiplicity of analyses, results from similar studies, and other relevant evidence PAGE 14 |
| Generalisability | 21 | Discuss the generalisability (external validity) of the study results PAGES 13, 14                                                                                                 |

**Other information**

|         |    |                                                                                                                                                                       |
|---------|----|-----------------------------------------------------------------------------------------------------------------------------------------------------------------------|
| Funding | 22 | Give the source of funding and the role of the funders for the present study and, if applicable, for the original study on which the present article is based PAGE 15 |
|---------|----|-----------------------------------------------------------------------------------------------------------------------------------------------------------------------|

\*Give information separately for cases and controls in case-control studies and, if applicable, for exposed and unexposed groups in cohort and cross-sectional studies.

**Note:** An Explanation and Elaboration article discusses each checklist item and gives methodological background and published examples of transparent reporting. The STROBE checklist is best used in conjunction with this article (freely available on the Web sites of PLoS Medicine at <http://www.plosmedicine.org/>, Annals of Internal Medicine at <http://www.annals.org/>, and Epidemiology at <http://www.epidem.com/>). Information on the STROBE Initiative is available at [www.strobe-statement.org](http://www.strobe-statement.org).
